# Supplementary material for: Analysis of complete genome sequence and major surface antigens of Neorickettsia helminthoeca, causative agent of salmon poisoning disease
Source: PubMed Central journal article supplement (PMC5481527; doi:10.1111/1751-7915.12731), 2017-06-06
Supplement: MBT2-10-933-s006.pdf [file MBT2-10-933-s006.pdf]

**Supplementary Table 1. Ortholog clusters conserved among *Neorickettsia helminthoeca*, *N. risticii*, and *N. sennetsu* based on three-way comparison analysis <sup>1</sup>**

| Ortholog Clusters                                             | Protein Name                                                                        | Role Category                                                                               |
|---------------------------------------------------------------|-------------------------------------------------------------------------------------|---------------------------------------------------------------------------------------------|
| <b><u>Amino acid biosynthesis</u></b>                         |                                                                                     |                                                                                             |
| NSE_RS00705,NRI_RS00745,NHE_RS00695                           | putative 3-phosphoshikimate 1-carboxyvinyltransferase                               | Amino acid biosynthesis   Aromatic amino acid family                                        |
| NSE_RS03830,NRI_RS03910,NHE_RS04025                           | AraM domain protein                                                                 | Amino acid biosynthesis   Aromatic amino acid family                                        |
| NSE_RS01045,NRI_RS01085,NHE_RS01045                           | aspartate-semialdehyde dehydrogenase                                                | Amino acid biosynthesis   Aspartate family                                                  |
| NSE_RS03085,NRI_RS03170,NHE_RS03235                           | aspartate aminotransferase                                                          | Amino acid biosynthesis   Aspartate family                                                  |
| NSE_RS03785,NRI_RS03870,NHE_RS03980                           | dihydrodipicolinate synthase                                                        | Amino acid biosynthesis   Aspartate family                                                  |
| NSE_RS01455,NRI_RS01505,NHE_RS01490                           | glutamine synthetase, type I                                                        | Amino acid biosynthesis   Glutamate family                                                  |
| NSE_RS02825,NRI_RS02915,NHE_RS02945                           | glutamine synthetase domain protein                                                 | Amino acid biosynthesis   Glutamate family                                                  |
| NSE_RS02670,NRI_RS02760,NHE_RS02780                           | bifunctional glutamate synthase subunit beta/2-polyprenylphenol hydroxylase (GS/PH) | Amino acid biosynthesis   Glutamate family                                                  |
| NSE_RS00865,NRI_RS00905,NHE_RS00860                           | serine hydroxymethyltransferase                                                     | Amino acid biosynthesis   Serine family                                                     |
| <b><u>Biosynthesis of cofactors and prosthetic groups</u></b> |                                                                                     |                                                                                             |
| NSE_RS02480,NRI_RS02540,NHE_RS02585                           | biotin synthase                                                                     | Biosynthesis of cofactors, prosthetic groups, and carriers   Biotin                         |
| NSE_RS02485,NRI_RS02545,NHE_RS02590,NHE_RS03545,NRI_RS03445   | 8-amino-7-oxononanoate synthase                                                     | Biosynthesis of cofactors, prosthetic groups, and carriers   Biotin                         |
| NSE_RS02495,NRI_RS02555,NHE_RS02600                           | biotin biosynthesis protein BioC                                                    | Biosynthesis of cofactors, prosthetic groups, and carriers   Biotin                         |
| NSE_RS02505,NRI_RS02565,NHE_RS02610,NHE_RS03625,NRI_RS03545   | adenosylmethionine-8-amino-7-oxononanoate aminotransferase                          | Biosynthesis of cofactors, prosthetic groups, and carriers   Biotin                         |
| NSE_RS03365,NRI_RS03445,NHE_RS03545,NRI_RS02545,NHE_RS02590   | 5-aminolevulinic acid synthase                                                      | Biosynthesis of cofactors, prosthetic groups, and carriers   Biotin                         |
| NSE_RS03465,NRI_RS03545,NHE_RS03625,NRI_RS02565,NHE_RS02610   | acetylornithine aminotransferase                                                    | Biosynthesis of cofactors, prosthetic groups, and carriers   Biotin                         |
| NSE_RS01965,NRI_RS02005,NHE_RS02010                           | dihydropteroate synthase                                                            | Biosynthesis of cofactors, prosthetic groups, and carriers   Folic acid                     |
| NSE_RS02030,NRI_RS02075,NHE_RS02085                           | putative dihydroneopterin aldolase                                                  | Biosynthesis of cofactors, prosthetic groups, and carriers   Folic acid                     |
| NSE_RS02405,NRI_RS02460,NHE_RS02505                           | GTP cyclohydrolase I                                                                | Biosynthesis of cofactors, prosthetic groups, and carriers   Folic acid                     |
| NSE_RS02905,NRI_RS02995,NHE_RS03030                           | folylpolyglutamate synthase                                                         | Biosynthesis of cofactors, prosthetic groups, and carriers   Folic acid                     |
| NSE_RS03340,NRI_RS03420,NHE_RS03505                           | FoID bifunctional protein                                                           | Biosynthesis of cofactors, prosthetic groups, and carriers   Folic acid                     |
| NSE_RS00730,NRI_RS00765,NHE_RS00720                           | glutathione synthetase                                                              | Biosynthesis of cofactors, prosthetic groups, and carriers   Glutathione and analogs        |
| NSE_RS01275,NRI_RS01320,NHE_RS01280                           | glutamate--cysteine ligase                                                          | Biosynthesis of cofactors, prosthetic groups, and carriers   Glutathione and analogs        |
| NSE_RS01560,NRI_RS01610,NHE_RS01610                           | putative porphobilinogen deaminase                                                  | Biosynthesis of cofactors, prosthetic groups, and carriers   Heme, porphyrin, and cobalamin |
| NSE_RS01595,NRI_RS01645,NHE_RS01645                           | porphobilinogen synthase                                                            | Biosynthesis of cofactors, prosthetic groups, and carriers   Heme, porphyrin, and cobalamin |

<sup>1</sup> Ortholog clusters were constructed using reciprocal BLASTP algorithm with E-value < 1e<sup>-10</sup>, and grouped by functional role categories. The protein name and role category of the designated ortholog cluster are based on those from *N. helminthoeca* genome.

|                                                             |                                                                                     |                                                                                             |
|-------------------------------------------------------------|-------------------------------------------------------------------------------------|---------------------------------------------------------------------------------------------|
| NSE_RS01830,NRI_RS01870,NHE_RS01875                         | coproporphyrinogen III oxidase, aerobic                                             | Biosynthesis of cofactors, prosthetic groups, and carriers   Heme, porphyrin, and cobalamin |
| NSE_RS02530,NRI_RS02590,NHE_RS02635                         | protoheme IX farnesyltransferase                                                    | Biosynthesis of cofactors, prosthetic groups, and carriers   Heme, porphyrin, and cobalamin |
| NSE_RS03200,NRI_RS03285,NHE_RS03360                         | ferrochelatase                                                                      | Biosynthesis of cofactors, prosthetic groups, and carriers   Heme, porphyrin, and cobalamin |
| NSE_RS03950,NRI_RS04030,NHE_RS00005                         | uroporphyrinogen decarboxylase                                                      | Biosynthesis of cofactors, prosthetic groups, and carriers   Heme, porphyrin, and cobalamin |
| NSE_RS01340,NRI_RS01390,NHE_RS01350                         | lipoic acid synthetase                                                              | Biosynthesis of cofactors, prosthetic groups, and carriers   Lipoate                        |
| NSE_RS01405,NRI_RS01455,NHE_RS01435                         | Coq7 family protein                                                                 | Biosynthesis of cofactors, prosthetic groups, and carriers   Menaquinone and ubiquinone     |
| NSE_RS01555,NRI_RS01605,NHE_RS01605                         | ubiquinone biosynthesis hydroxylase, UbiH/UbiF/VisC/COQ6 family                     | Biosynthesis of cofactors, prosthetic groups, and carriers   Menaquinone and ubiquinone     |
| NSE_RS02555,NRI_RS02615,NHE_RS02665                         | 3-demethylubiquinone-9 3-methyltransferase                                          | Biosynthesis of cofactors, prosthetic groups, and carriers   Menaquinone and ubiquinone     |
| NSE_RS02585,NRI_RS02655,NHE_RS02705                         | putative ubiquinone biosynthesis protein                                            | Biosynthesis of cofactors, prosthetic groups, and carriers   Menaquinone and ubiquinone     |
| NSE_RS03275,NRI_RS03350,NHE_RS03435                         | 4-hydroxybenzoate octaprenyltransferase                                             | Biosynthesis of cofactors, prosthetic groups, and carriers   Menaquinone and ubiquinone     |
| NSE_RS03150,NRI_RS03235,NHE_RS03305                         | molybdopterin biosynthesis protein MoeB                                             | Biosynthesis of cofactors, prosthetic groups, and carriers   Molybdopterin                  |
| NSE_RS00525,NRI_RS00570,NHE_RS00520                         | 2C-methyl-D-erythritol 2,4-cyclodiphosphate synthase                                | Biosynthesis of cofactors, prosthetic groups, and carriers   Other                          |
| NSE_RS00695,NRI_RS00735,NHE_RS00685                         | putative 2-C-methyl-D-erythritol 4-phosphate cytidyltransferase                     | Biosynthesis of cofactors, prosthetic groups, and carriers   Other                          |
| NSE_RS00950,NRI_RS00990,NHE_RS00950,NRI_RS02905,NHE_RS02935 | polyprenyl synthetase family protein                                                | Biosynthesis of cofactors, prosthetic groups, and carriers   Other                          |
| NSE_RS01240,NRI_RS01285,NHE_RS01245                         | iron-sulfur cluster assembly accessory protein                                      | Biosynthesis of cofactors, prosthetic groups, and carriers   Other                          |
| NSE_RS01245,NRI_RS01290,NHE_RS01250                         | FeS cluster assembly scaffold IscU                                                  | Biosynthesis of cofactors, prosthetic groups, and carriers   Other                          |
| NSE_RS01250,NRI_RS01295,NHE_RS01255                         | cysteine desulfurase                                                                | Biosynthesis of cofactors, prosthetic groups, and carriers   Other                          |
| NSE_RS01255,NRI_RS01300,NHE_RS01260                         | rrf2 family transcriptional regulator with aminotransferase, class V family protein | Biosynthesis of cofactors, prosthetic groups, and carriers   Other                          |
| NSE_RS01770,NRI_RS01810,NHE_RS01815                         | 4-hydroxy-3-methylbut-2-enyl diphosphate reductase                                  | Biosynthesis of cofactors, prosthetic groups, and carriers   Other                          |
| NSE_RS01790,NRI_RS01830,NHE_RS01835                         | 1-deoxy-D-xylulose 5-phosphate reductoisomerase                                     | Biosynthesis of cofactors, prosthetic groups, and carriers   Other                          |
| NSE_RS01845,NRI_RS01885,NHE_RS01890                         | putative iron-sulfur cluster assembly accessory protein                             | Biosynthesis of cofactors, prosthetic groups, and carriers   Other                          |
| NSE_RS02815,NRI_RS02905,NHE_RS02935,NRI_RS00990,NHE_RS00950 | putative geranyltranstransferase                                                    | Biosynthesis of cofactors, prosthetic groups, and carriers   Other                          |
| NSE_RS02925,NRI_RS03015,NHE_RS03050                         | putative 4-diphosphocytidyl-2C-methyl-D-erythritol kinase                           | Biosynthesis of cofactors, prosthetic groups, and carriers   Other                          |
| NSE_RS03245,NRI_RS03325,NHE_RS03405                         | 1-hydroxy-2-methyl-2-(E)-butenyl 4-diphosphate synthase                             | Biosynthesis of cofactors, prosthetic groups, and carriers   Other                          |
| NSE_RS01280,NRI_RS01325,NHE_RS01285                         | dephospho-CoA kinase                                                                | Biosynthesis of cofactors, prosthetic groups, and carriers   Pantothenate and coenzyme A    |
| NSE_RS03960,NRI_RS04040,NHE_RS00015                         | pantetheine-phosphate adenyltransferase                                             | Biosynthesis of cofactors, prosthetic groups, and carriers   Pantothenate and coenzyme A    |
| NSE_RS00395,NRI_RS00400,NHE_RS00400                         | NAD <sup>+</sup> synthetase                                                         | Biosynthesis of cofactors, prosthetic groups, and carriers   Pyridine nucleotides           |
| NSE_RS00470,NRI_RS00515,NHE_RS00465                         | nicotinate-nucleotide pyrophosphorylase                                             | Biosynthesis of cofactors, prosthetic groups, and carriers   Pyridine nucleotides           |

|                                     |                                                                                |                                                                                                 |
|-------------------------------------|--------------------------------------------------------------------------------|-------------------------------------------------------------------------------------------------|
| NSE_RS02890,NRI_RS02980,NHE_RS04215 | putative nicotinate (nicotinamide) nucleotide adenyltransferase                | Biosynthesis of cofactors, prosthetic groups, and carriers   Pyridine nucleotides               |
| NSE_RS01330,NRI_RS01380,NHE_RS01340 | pyridoxal phosphate biosynthetic protein PdxJ                                  | Biosynthesis of cofactors, prosthetic groups, and carriers   Pyridoxine                         |
| NSE_RS01515,NRI_RS01565,NHE_RS01560 | putative pyridoxamine 5-phosphate oxidase                                      | Biosynthesis of cofactors, prosthetic groups, and carriers   Pyridoxine                         |
| NSE_RS00170,NRI_RS00155,NHE_RS00165 | riboflavin biosynthesis protein RibF                                           | Biosynthesis of cofactors, prosthetic groups, and carriers   Riboflavin, FMN, and FAD           |
| NSE_RS00365,NRI_RS00360,NHE_RS00375 | cytidine/deoxycytidylate deaminase family protein                              | Biosynthesis of cofactors, prosthetic groups, and carriers   Riboflavin, FMN, and FAD           |
| NSE_RS01630,NRI_RS01680,NHE_RS01680 | 6,7-dimethyl-8-ribityllumazine synthase                                        | Biosynthesis of cofactors, prosthetic groups, and carriers   Riboflavin, FMN, and FAD           |
| NSE_RS02020,NRI_RS02065,NHE_RS02075 | riboflavin biosynthesis protein RibD                                           | Biosynthesis of cofactors, prosthetic groups, and carriers   Riboflavin, FMN, and FAD           |
| NSE_RS02635,NRI_RS02705,NHE_RS02755 | 3,4-dihydroxy-2-butanone 4-phosphate synthase                                  | Biosynthesis of cofactors, prosthetic groups, and carriers   Riboflavin, FMN, and FAD           |
| NSE_RS03025,NRI_RS03115,NHE_RS03170 | GTP cyclohydrolase II                                                          | Biosynthesis of cofactors, prosthetic groups, and carriers   Riboflavin, FMN, and FAD           |
| NSE_RS03480,NRI_RS03560,NHE_RS03640 | riboflavin synthase, alpha subunit                                             | Biosynthesis of cofactors, prosthetic groups, and carriers   Riboflavin, FMN, and FAD           |
| NSE_RS00190,NRI_RS00175,NHE_RS00185 | thiamine biosynthesis protein ThiS                                             | Biosynthesis of cofactors, prosthetic groups, and carriers   Thiamine                           |
| NSE_RS00875,NRI_RS00915,NHE_RS00870 | putative thiamine-phosphate pyrophosphorylase                                  | Biosynthesis of cofactors, prosthetic groups, and carriers   Thiamine                           |
| NSE_RS01955,NRI_RS02000,NHE_RS02005 | thiamin biosynthesis ThiG                                                      | Biosynthesis of cofactors, prosthetic groups, and carriers   Thiamine                           |
| NSE_RS01995,NRI_RS02035,NHE_RS02040 | coenzyme PQQ synthesis protein C                                               | Biosynthesis of cofactors, prosthetic groups, and carriers   Thiamine                           |
| NSE_RS03880,NRI_RS03960,NHE_RS04080 | putative phosphomethylpyrimidine kinase                                        | Biosynthesis of cofactors, prosthetic groups, and carriers   Thiamine                           |
| <b><u>Cell envelope</u></b>         |                                                                                |                                                                                                 |
| NSE_RS01935,NRI_RS01980,NHE_RS01985 | UDP-N-acetylmuramoyl-tripeptide--D-alanyl-D-alanine ligase truncation, partial | Cell envelope   Biosynthesis and degradation of murein sacculus and peptidoglycan               |
| NSE_RS02415,NRI_RS02470,NHE_RS02520 | putative UDP-N-acetylenolpyruvoylglucosamine reductase                         | Cell envelope   Biosynthesis and degradation of murein sacculus and peptidoglycan               |
| NSE_RS03755,NRI_RS03840,NHE_RS03930 | S-adenosyl-methyltransferase MraW                                              | Cell envelope   Biosynthesis and degradation of murein sacculus and peptidoglycan               |
| NSE_RS00820,NRI_RS00860,NHE_RS00815 | exopolysaccharide synthesis protein                                            | Cell envelope   Biosynthesis and degradation of surface polysaccharides and lipopolysaccharides |
| NSE_RS03845,NRI_RS03925,NHE_RS04040 | undecaprenyl diphosphate synthase                                              | Cell envelope   Biosynthesis and degradation of surface polysaccharides and lipopolysaccharides |
| NSE_RS00220,NRI_RS00205,NHE_RS00215 | putative membrane protein                                                      | Cell envelope   Other                                                                           |
| NSE_RS00295,NRI_RS00285,NHE_RS00295 | putative membrane protein                                                      | Cell envelope   Other                                                                           |
| NSE_RS00300,NRI_RS00290,NHE_RS00305 | putative lipoprotein                                                           | Cell envelope   Other                                                                           |
| NSE_RS00465,NRI_RS00510,NHE_RS00460 | putative membrane protein                                                      | Cell envelope   Other                                                                           |
| NSE_RS00815,NRI_RS00855,NHE_RS00810 | hypothetical protein                                                           | Cell envelope   Other                                                                           |
| NSE_RS00965,NRI_RS01005,NHE_RS00965 | 51 kDa major antigen (P51)                                                     | Cell envelope   Other                                                                           |
| NSE_RS01635,NRI_RS01685,NHE_RS01685 | inner membrane protein, 60 kDa                                                 | Cell envelope   Other                                                                           |

|                                                                                                                                     |                                               |                                                         |
|-------------------------------------------------------------------------------------------------------------------------------------|-----------------------------------------------|---------------------------------------------------------|
| NSE_RS02220,NRI_RS02265,NHE_RS02300                                                                                                 | putative membrane protein                     | Cell envelope   Other                                   |
| NSE_RS02265,NRI_RS02310,NHE_RS02345                                                                                                 | major surface protein                         | Cell envelope   Other                                   |
| NSE_RS02305,NRI_RS02355,NHE_RS02395                                                                                                 | membrane protein, MviN family                 | Cell envelope   Other                                   |
| NSE_RS02355,NRI_RS02405,NHE_RS02445                                                                                                 | putative membrane protein                     | Cell envelope   Other                                   |
| NSE_RS02995,NRI_RS03085,NHE_RS03135                                                                                                 | putative membrane protein                     | Cell envelope   Other                                   |
| NSE_RS03220,NRI_RS03305,NHE_RS03385                                                                                                 | membrane protein, TerC family                 | Cell envelope   Other                                   |
| NSE_RS03550,NRI_RS03630,NHE_RS03715                                                                                                 | <i>Neorickettsia</i> surface protein 1        | Cell envelope   Other                                   |
| NSE_RS03555,NRI_RS03635,NHE_RS03720                                                                                                 | <i>Neorickettsia</i> surface protein 2        | Cell envelope   Other                                   |
| NSE_RS03560,NRI_RS03640,NHE_RS03725                                                                                                 | <i>Neorickettsia</i> surface protein 3        | Cell envelope   Other                                   |
| NSE_RS03620,NRI_RS03705,NHE_RS03785                                                                                                 | putative peptidoglycan-associated lipoprotein | Cell envelope   Other                                   |
| NSE_RS03690,NRI_RS03775,NRI_RS03775,<br>NRI_RS03775,NRI_RS03780,NRI_RS03780,<br>NRI_RS03780,NRI_RS03785,NRI_RS03785,<br>NHE_RS03855 | strain-specific surface antigen               | Cell envelope   Other                                   |
| NSE_RS03700,NRI_RS03785,NRI_RS03775,<br>NRI_RS03775,NRI_RS03775,NRI_RS03775,<br>NRI_RS03780,NRI_RS03780,NRI_RS03780,<br>NHE_RS03855 | strain-specific surface antigen               | Cell envelope   Other                                   |
| NSE_RS03775,NRI_RS03860,NHE_RS03965,<br>NRI_RS03865,NHE_RS03970                                                                     | putative membrane protein                     | Cell envelope   Other                                   |
| NSE_RS03780,NRI_RS03865,NHE_RS03970,<br>NRI_RS03860,NHE_RS03965                                                                     | putative membrane protein                     | Cell envelope   Other                                   |
| NSE_RS03810,NRI_RS03890,NHE_RS04005                                                                                                 | putative vacJ lipoprotein                     | Cell envelope   Other                                   |
| <b><u>Cellular processes</u></b>                                                                                                    |                                               |                                                         |
| NSE_RS00245,NRI_RS00230,NHE_RS00240                                                                                                 | putative osmotically inducible protein        | Cellular processes   Adaptations to atypical conditions |
| NSE_RS01530,NRI_RS01580,NHE_RS01580                                                                                                 | acid phosphatase SurE                         | Cellular processes   Adaptations to atypical conditions |
| NSE_RS00015,NRI_RS00005,NHE_RS00025                                                                                                 | chromosome partitioning protein, ParB family  | Cellular processes   Cell division                      |
| NSE_RS00460,NRI_RS00505,NHE_RS00455                                                                                                 | ribonuclease, Rne/Rng family                  | Cellular processes   Cell division                      |
| NSE_RS01420,NRI_RS01470,NHE_RS01450                                                                                                 | cell division protein FtsZ                    | Cellular processes   Cell division                      |
| NSE_RS01730,NRI_RS01770,NHE_RS01770                                                                                                 | cell division protein FtsA                    | Cellular processes   Cell division                      |
| NSE_RS02400,NRI_RS02455,NHE_RS02500                                                                                                 | putative cell division protein                | Cellular processes   Cell division                      |
| NSE_RS03905,NRI_RS03985,NHE_RS04110                                                                                                 | GTP-binding protein Era                       | Cellular processes   Cell division                      |
| NSE_RS03990,NRI_RS04075,NHE_RS04210                                                                                                 | putative cell division protein FtsK           | Cellular processes   Cell division                      |
| NSE_RS02295,NRI_RS02340,NHE_RS02380                                                                                                 | antioxidant, AhpC/Tsa family                  | Cellular processes   Detoxification                     |
| NSE_RS03430,NRI_RS03510,NHE_RS03595                                                                                                 | superoxide dismutase, Fe                      | Cellular processes   Detoxification                     |
| NSE_RS01690,NRI_RS01740,NHE_RS04195,<br>NHE_RS04190                                                                                 | putative competence protein F                 | Cellular processes   DNA transformation                 |
| NSE_RS03765,NRI_RS03850,NHE_RS03940                                                                                                 | putative competence protein ComL              | Cellular processes   DNA transformation                 |
| NSE_RS01610,NRI_RS01660,NHE_RS01660                                                                                                 | ATP synthase F0, C chain                      | Cellular processes   Pathogenesis                       |
| NSE_RS03105,NRI_RS03190,NHE_RS03255                                                                                                 | ATP synthase F1, epsilon subunit              | Cellular processes   Pathogenesis                       |
| NSE_RS00290,NRI_RS00280,NHE_RS00290                                                                                                 | drug resistance transporter, Bcr/CfiA family  | Cellular processes   Toxin production and resistance    |

|                                                             |                                                            |                                                             |
|-------------------------------------------------------------|------------------------------------------------------------|-------------------------------------------------------------|
| NSE_RS00750,NRI_RS00790,NHE_RS00745                         | transporter, AcrB/AcrD/AcrF family                         | Cellular processes   Toxin production and resistance        |
| NSE_RS00520,NRI_RS00565,NHE_RS00515                         | 5,10-methenyltetrahydrofolate synthetase                   | Central intermediary metabolism   One-carbon metabolism     |
| NSE_RS01800,NRI_RS01840,NHE_RS01845,NRI_RS02775,NHE_RS02800 | oxidoreductase, short-chain dehydrogenase/reductase family | Central intermediary metabolism   Other                     |
| NSE_RS01975,NRI_RS02015,NHE_RS02020                         | S-adenosylmethionine synthetase                            | Central intermediary metabolism   Other                     |
| NSE_RS02685,NRI_RS02775,NHE_RS02800,NRI_RS01840             | 3-oxoacyl-[acyl-carrier protein] reductase                 | Central intermediary metabolism   Other                     |
| NSE_RS02980,NRI_RS03070,NHE_RS03110                         | inorganic pyrophosphatase                                  | Central intermediary metabolism   Phosphorus compounds      |
| <b>DNA metabolism</b>                                       |                                                            |                                                             |
| NSE_RS02595,NRI_RS02665,NHE_RS02715                         | DNA-binding protein HU                                     | DNA metabolism   Chromosome-associated proteins             |
| NSE_RS00560,NRI_RS00600,NHE_RS00545,NHE_RS01850,NRI_RS01845 | tyrosine recombinase XerD                                  | DNA metabolism   DNA replication, recombination, and repair |
| NSE_RS00620,NRI_RS00660,NHE_RS00605                         | DnaK suppressor protein                                    | DNA metabolism   DNA replication, recombination, and repair |
| NSE_RS00645,NRI_RS00685,NHE_RS00630                         | DNA polymerase III, alpha subunit                          | DNA metabolism   DNA replication, recombination, and repair |
| NSE_RS00660,NRI_RS00700,NHE_RS00645                         | DNA polymerase III, beta subunit                           | DNA metabolism   DNA replication, recombination, and repair |
| NSE_RS00780,NRI_RS00820,NHE_RS00775                         | putative DNA replication and repair protein RecF           | DNA metabolism   DNA replication, recombination, and repair |
| NSE_RS00810,NRI_RS00850,NHE_RS00805                         | primosomal protein N'                                      | DNA metabolism   DNA replication, recombination, and repair |
| NSE_RS00915,NRI_RS04065,NHE_RS00910,NRI_RS04060             | DNA repair protein RadC                                    | DNA metabolism   DNA replication, recombination, and repair |
| NSE_RS00975,NRI_RS01015,NHE_RS00975                         | endonuclease III                                           | DNA metabolism   DNA replication, recombination, and repair |
| NSE_RS01040,NRI_RS01080,NHE_RS01040                         | chromosomal replication initiator protein DnaA             | DNA metabolism   DNA replication, recombination, and repair |
| NSE_RS01685,NRI_RS01735,NHE_RS01735                         | exodeoxyribonuclease III                                   | DNA metabolism   DNA replication, recombination, and repair |
| NSE_RS01805,NRI_RS01845,NHE_RS01850,NRI_RS00600,NHE_RS00545 | site-specific recombinase, phage integrase family          | DNA metabolism   DNA replication, recombination, and repair |
| NSE_RS01855,NRI_RS01895,NHE_RS01900                         | putative DNA repair protein RecO                           | DNA metabolism   DNA replication, recombination, and repair |
| NSE_RS01885,NRI_RS01930,NHE_RS01930                         | ATP-dependent DNA helicase, UvrD/REP family                | DNA metabolism   DNA replication, recombination, and repair |
| NSE_RS01895,NRI_RS01940,NHE_RS01945                         | DNA polymerase III, epsilon subunit                        | DNA metabolism   DNA replication, recombination, and repair |
| NSE_RS01990,NRI_RS02030,NHE_RS02035                         | putative DNA polymerase III, gamma/tau subunit             | DNA metabolism   DNA replication, recombination, and repair |
| NSE_RS02025,NRI_RS02070,NHE_RS02080                         | DNA ligase, NAD-dependent                                  | DNA metabolism   DNA replication, recombination, and repair |
| NSE_RS02170,NRI_RS02215,NHE_RS02250                         | recA protein                                               | DNA metabolism   DNA replication, recombination, and repair |
| NSE_RS02360,NRI_RS02410,NHE_RS02455                         | holliday junction DNA helicase RuvA                        | DNA metabolism   DNA replication, recombination, and repair |
| NSE_RS02365,NRI_RS02415,NHE_RS02460                         | holliday junction DNA helicase RuvB                        | DNA metabolism   DNA replication, recombination, and repair |
| NSE_RS02430,NRI_RS02485,NHE_RS02535                         | DNA topoisomerase I                                        | DNA metabolism   DNA replication, recombination, and repair |
| NSE_RS02625,NRI_RS02695,NHE_RS02745                         | polyA polymerase family protein                            | DNA metabolism   DNA replication, recombination, and repair |
| NSE_RS02720,NRI_RS02810,NHE_RS02840                         | DNA polymerase I                                           | DNA metabolism   DNA replication, recombination, and repair |
| NSE_RS02795,NRI_RS02885,NHE_RS02915                         | ATP-dependent DNA helicase RecG                            | DNA metabolism   DNA replication, recombination, and repair |
| NSE_RS02895,NRI_RS02985,NHE_RS03020                         | single-stranded-DNA-specific exonuclease RecJ              | DNA metabolism   DNA replication, recombination, and repair |
| NSE_RS02930,NRI_RS03020,NHE_RS03055                         | DNA gyrase, B subunit                                      | DNA metabolism   DNA replication, recombination, and repair |
| NSE_RS03090,NRI_RS03175,NHE_RS03240                         | single-strand binding protein                              | DNA metabolism   DNA replication, recombination, and repair |

|                                                                                                                                     |                                                             |                                                             |
|-------------------------------------------------------------------------------------------------------------------------------------|-------------------------------------------------------------|-------------------------------------------------------------|
| NSE_RS03670,NRI_RS03755,NHE_RS03835                                                                                                 | recombination protein RecR                                  | DNA metabolism   DNA replication, recombination, and repair |
| NSE_RS03805,NRI_RS03885,NHE_RS04000                                                                                                 | uracil-DNA glycosylase, family 4                            | DNA metabolism   DNA replication, recombination, and repair |
| NSE_RS03885,NRI_RS03965,NHE_RS04085                                                                                                 | crossover junction endodeoxyribonuclease RuvC               | DNA metabolism   DNA replication, recombination, and repair |
| NSE_RS03900,NRI_RS03980,NHE_RS04105                                                                                                 | DNA gyrase, A subunit                                       | DNA metabolism   DNA replication, recombination, and repair |
| NSE_RS03915,NRI_RS03995,NHE_RS04120                                                                                                 | DNA primase                                                 | DNA metabolism   DNA replication, recombination, and repair |
| <b><u>Energy metabolism</u></b>                                                                                                     |                                                             |                                                             |
| NSE_RS00910,NRI_RS00950,NHE_RS00905                                                                                                 | glycerol-3-phosphate dehydrogenase (NAD(P)+)                | Energy metabolism   Aerobic                                 |
| NSE_RS03315,NRI_RS03395,NHE_RS03480                                                                                                 | propionyl-CoA carboxylase, alpha subunit                    | Energy metabolism   Amino acids and amines                  |
| NSE_RS00510,NRI_RS00555,NHE_RS00505,NRI_RS03195,NHE_RS03260                                                                         | ATP synthase F1, alpha subunit                              | Energy metabolism   ATP-proton motive force interconversion |
| NSE_RS00515,NRI_RS00560,NHE_RS00510                                                                                                 | ATP synthase F1, delta subunit                              | Energy metabolism   ATP-proton motive force interconversion |
| NSE_RS01605,NRI_RS01655,NHE_RS01655                                                                                                 | ATP synthase F0, A subunit                                  | Energy metabolism   ATP-proton motive force interconversion |
| NSE_RS01620,NRI_RS01670,NHE_RS01670                                                                                                 | putative ATPase F0, B chain                                 | Energy metabolism   ATP-proton motive force interconversion |
| NSE_RS02410,NRI_RS02465,NHE_RS02510                                                                                                 | ATP synthase F1, gamma subunit                              | Energy metabolism   ATP-proton motive force interconversion |
| NSE_RS03110,NRI_RS03195,NHE_RS03260,NRI_RS00555,NHE_RS00505                                                                         | ATP synthase F1, beta subunit                               | Energy metabolism   ATP-proton motive force interconversion |
| NSE_RS00060,NRI_RS00050,NHE_RS00065                                                                                                 | NADH dehydrogenase I, J subunit                             | Energy metabolism   Electron transport                      |
| NSE_RS00065,NRI_RS00055,NHE_RS00070                                                                                                 | NADH dehydrogenase I, K subunit                             | Energy metabolism   Electron transport                      |
| NSE_RS00070,NRI_RS00060,NHE_RS00075,NHE_RS02400,NRI_RS02360,NRI_RS02890,NHE_RS02920,NRI_RS02955,NHE_RS02990,NRI_RS02895,NHE_RS02925 | NADH dehydrogenase I, L subunit                             | Energy metabolism   Electron transport                      |
| NSE_RS00235,NRI_RS00220,NHE_RS00230                                                                                                 | NADH dehydrogenase I, G subunit                             | Energy metabolism   Electron transport                      |
| NSE_RS00240,NRI_RS00225,NHE_RS00235                                                                                                 | NADH dehydrogenase I, H subunit                             | Energy metabolism   Electron transport                      |
| NSE_RS00905,NRI_RS00945,NHE_RS00900                                                                                                 | thioredoxin                                                 | Energy metabolism   Electron transport                      |
| NSE_RS01035,NRI_RS01075,NHE_RS01035                                                                                                 | cytochrome c oxidase assembly protein CtaG                  | Energy metabolism   Electron transport                      |
| NSE_RS01225,NRI_RS01270,NHE_RS01230                                                                                                 | iron-sulfur cluster binding protein                         | Energy metabolism   Electron transport                      |
| NSE_RS01290,NRI_RS01335,NHE_RS01295                                                                                                 | glutaredoxin 3                                              | Energy metabolism   Electron transport                      |
| NSE_RS01370,NRI_RS01420,NHE_RS01380                                                                                                 | ferredoxin                                                  | Energy metabolism   Electron transport                      |
| NSE_RS01545,NRI_RS01595,NHE_RS01595                                                                                                 | quinone oxidoreductase                                      | Energy metabolism   Electron transport                      |
| NSE_RS01550,NRI_RS01600,NHE_RS01600                                                                                                 | putative oxidoreductase                                     | Energy metabolism   Electron transport                      |
| NSE_RS01740,NRI_RS01780,NHE_RS01780                                                                                                 | NADH dehydrogenase I, A subunit                             | Energy metabolism   Electron transport                      |
| NSE_RS01745,NRI_RS01785,NHE_RS01785                                                                                                 | NADH dehydrogenase I, B subunit                             | Energy metabolism   Electron transport                      |
| NSE_RS01750,NRI_RS01790,NHE_RS01790                                                                                                 | NADH dehydrogenase I, C subunit                             | Energy metabolism   Electron transport                      |
| NSE_RS01910,NRI_RS01955,NHE_RS01960                                                                                                 | cytochrome c                                                | Energy metabolism   Electron transport                      |
| NSE_RS02290,NRI_RS02335,NHE_RS02375,NHE_RS03310,NRI_RS03240                                                                         | thioredoxin-disulfide reductase                             | Energy metabolism   Electron transport                      |
| NSE_RS02325,NRI_RS02375,NHE_RS02415                                                                                                 | NADH dehydrogenase I, D subunit                             | Energy metabolism   Electron transport                      |
| NSE_RS02350,NRI_RS02400,NHE_RS02440                                                                                                 | cytochrome c-type biogenesis protein, CcmF/CycK/CcsA family | Energy metabolism   Electron transport                      |

|                                                                                                                                     |                                                              |                                                |
|-------------------------------------------------------------------------------------------------------------------------------------|--------------------------------------------------------------|------------------------------------------------|
| NSE_RS02520,NRI_RS02580,NHE_RS02625                                                                                                 | cytochrome c oxidase, subunit II                             | Energy metabolism   Electron transport         |
| NSE_RS02525,NRI_RS02585,NHE_RS02630                                                                                                 | cytochrome c oxidase, subunit I                              | Energy metabolism   Electron transport         |
| NSE_RS02535,NRI_RS02595,NHE_RS02640                                                                                                 | ubiquinol-cytochrome c reductase, iron-sulfur subunit        | Energy metabolism   Electron transport         |
| NSE_RS02540,NRI_RS02600,NHE_RS02645                                                                                                 | ubiquinol-cytochrome c reductase, cytochrome b               | Energy metabolism   Electron transport         |
| NSE_RS02545,NRI_RS02605,NHE_RS02650                                                                                                 | ubiquinol-cytochrome c reductase, cytochrome c1              | Energy metabolism   Electron transport         |
| NSE_RS02580,NRI_RS02650,NHE_RS02700                                                                                                 | NADH dehydrogenase I, E subunit                              | Energy metabolism   Electron transport         |
| NSE_RS02725,NRI_RS02815,NHE_RS02845                                                                                                 | cytochrome c oxidase, subunit III                            | Energy metabolism   Electron transport         |
| NSE_RS02310,NRI_RS02360,NHE_RS02400,NHE_RS02990,NHE_RS00075,NRI_RS00060,NRI_RS02955,NHE_RS02920,NRI_RS02890                         | NADH-ubiquinone/plastoquinone oxidoreductase family protein  | Energy metabolism   Electron transport         |
| NSE_RS02800,NRI_RS02890,NHE_RS02920,NHE_RS00075,NHE_RS02400,NRI_RS02955,NRI_RS00060,NRI_RS02360,NHE_RS02990,NHE_RS02925             | NADH dehydrogenase I, M subunit                              | Energy metabolism   Electron transport         |
| NSE_RS02805,NRI_RS02895,NHE_RS02925,NHE_RS02990,NRI_RS02955,NRI_RS00060,NHE_RS00075,NHE_RS02920                                     | NADH dehydrogenase I, N subunit                              | Energy metabolism   Electron transport         |
| NSE_RS02865,NRI_RS02955,NHE_RS02990,NRI_RS02360,NRI_RS02890,NHE_RS02920,NHE_RS02400,NHE_RS00075,NHE_RS02925,NRI_RS00060,NRI_RS02895 | NADH-ubiquinone/plastoquinone oxidoreductase family protein  | Energy metabolism   Electron transport         |
| NSE_RS02900,NRI_RS02990,NHE_RS03025                                                                                                 | NADH dehydrogenase I, F subunit                              | Energy metabolism   Electron transport         |
| NSE_RS03155,NRI_RS03240,NHE_RS03310,NHE_RS02375,NRI_RS02335                                                                         | pyridine nucleotide-disulphide oxidoreductase family protein | Energy metabolism   Electron transport         |
| NSE_RS03335,NRI_RS03415,NHE_RS03500                                                                                                 | NADH dehydrogenase I, I subunit                              | Energy metabolism   Electron transport         |
| NSE_RS03375,NRI_RS03455,NHE_RS03555                                                                                                 | putative cytochrome c-type biogenesis protein CcmE           | Energy metabolism   Electron transport         |
| NSE_RS03490,NRI_RS03570,NHE_RS03650                                                                                                 | putative cytochrome oxidase assembly protein                 | Energy metabolism   Electron transport         |
| NSE_RS03645,NRI_RS03730,NHE_RS03810                                                                                                 | thioredoxin 1                                                | Energy metabolism   Electron transport         |
| NSE_RS03790,NRI_RS03875,NHE_RS03985                                                                                                 | cytochrome b561 family protein                               | Energy metabolism   Electron transport         |
| NSE_RS00555,NRI_RS00595,NHE_RS00550                                                                                                 | putative fructose-bisphosphate aldolase, class I             | Energy metabolism   Glycolysis/gluconeogenesis |
| NSE_RS01015,NRI_RS01055,NHE_RS01015                                                                                                 | triosephosphate isomerase                                    | Energy metabolism   Glycolysis/gluconeogenesis |
| NSE_RS01760,NRI_RS01800,NHE_RS01800                                                                                                 | glyceraldehyde-3-phosphate dehydrogenase, type I             | Energy metabolism   Glycolysis/gluconeogenesis |
| NSE_RS01765,NRI_RS01805,NHE_RS01805                                                                                                 | phosphoglycerate kinase                                      | Energy metabolism   Glycolysis/gluconeogenesis |
| NSE_RS02975,NRI_RS03065,NHE_RS03105                                                                                                 | enolase                                                      | Energy metabolism   Glycolysis/gluconeogenesis |
| NSE_RS03630,NRI_RS03715,NHE_RS03795                                                                                                 | 2,3-bisphosphoglycerate-independent phosphoglycerate mutase  | Energy metabolism   Glycolysis/gluconeogenesis |
| NSE_RS01510,NRI_RS01560,NHE_RS01555                                                                                                 | pyruvate, phosphate dikinase                                 | Energy metabolism   Other                      |
| NSE_RS00860,NRI_RS00900,NHE_RS00855                                                                                                 | ribose 5-phosphate isomerase B                               | Energy metabolism   Pentose phosphate pathway  |
| NSE_RS01395,NRI_RS01445,NHE_RS01420                                                                                                 | ribulose-phosphate 3-epimerase                               | Energy metabolism   Pentose phosphate pathway  |
| NSE_RS02860,NRI_RS02950,NHE_RS02985,NHE_RS02985                                                                                     | transketolase                                                | Energy metabolism   Pentose phosphate pathway  |
| NSE_RS03100,NRI_RS03185,NHE_RS03250                                                                                                 | putative transaldolase                                       | Energy metabolism   Pentose phosphate pathway  |
| NSE_RS01865,NRI_RS01910,NHE_RS01915,NHE_RS02820,NRI_RS02795                                                                         | dihydrolipoamide dehydrogenase                               | Energy metabolism   Pyruvate dehydrogenase     |
| NSE_RS02705,NRI_RS02795,NHE_RS02820,NHE_RS01915,NRI_RS01910                                                                         | dihydrolipoamide dehydrogenase                               | Energy metabolism   Pyruvate dehydrogenase     |

|                                                             |                                                                                    |                                            |
|-------------------------------------------------------------|------------------------------------------------------------------------------------|--------------------------------------------|
| NSE_RS03030,NRI_RS03120,NHE_RS03185                         | putative pyruvate dehydrogenase complex, E1 component, beta subunit                | Energy metabolism   Pyruvate dehydrogenase |
| NSE_RS03255,NRI_RS03335,NHE_RS03420                         | pyruvate dehydrogenase complex, E1 component, pyruvate dehydrogenase alpha subunit | Energy metabolism   Pyruvate dehydrogenase |
| NSE_RS00205,NRI_RS00190,NHE_RS00200                         | succinate dehydrogenase, cytochrome b556 subunit                                   | Energy metabolism   TCA cycle              |
| NSE_RS00210,NRI_RS00195,NHE_RS00205                         | putative succinate dehydrogenase, hydrophobic membrane anchor protein              | Energy metabolism   TCA cycle              |
| NSE_RS00250,NRI_RS00235,NHE_RS00245                         | fumarate hydratase, class II                                                       | Energy metabolism   TCA cycle              |
| NSE_RS00670,NRI_RS00710,NHE_RS00655                         | dehydrogenase, isocitrate/isopropylmalate family                                   | Energy metabolism   TCA cycle              |
| NSE_RS00995,NRI_RS01035,NHE_RS00995                         | succinyl-CoA synthetase, alpha subunit                                             | Energy metabolism   TCA cycle              |
| NSE_RS01000,NRI_RS01040,NHE_RS01000                         | succinyl-CoA synthetase, beta subunit                                              | Energy metabolism   TCA cycle              |
| NSE_RS02185,NRI_RS02230,NHE_RS02265                         | succinate dehydrogenase and fumarate reductase iron-sulfur protein                 | Energy metabolism   TCA cycle              |
| NSE_RS02255,NRI_RS02300,NHE_RS02335,NHE_RS04075,NRI_RS03955 | 2-oxoglutarate dehydrogenase, E2 component, dihydrolipoamide succinyltransferase   | Energy metabolism   TCA cycle              |
| NSE_RS02370,NRI_RS02420,NHE_RS02465                         | 2-oxoglutarate dehydrogenase, E1 component                                         | Energy metabolism   TCA cycle              |
| NSE_RS02445,NRI_RS02500,NHE_RS02550                         | aconitate hydratase 1                                                              | Energy metabolism   TCA cycle              |
| NSE_RS02965,NRI_RS03055,NHE_RS03090                         | citrate synthase                                                                   | Energy metabolism   TCA cycle              |
| NSE_RS03875,NRI_RS03955,NHE_RS04075,NRI_RS02300,NHE_RS02335 | pyruvate dehydrogenase complex, E2 component, dihydrolipoamide acetyltransferase   | Energy metabolism   TCA cycle              |
| NSE_RS03890,NRI_RS03970,NHE_RS04090                         | malate dehydrogenase, NAD-dependent                                                | Energy metabolism   TCA cycle              |

### **Fatty acid and phospholipid metabolism**

|                                     |                                                                    |                                                       |
|-------------------------------------|--------------------------------------------------------------------|-------------------------------------------------------|
| NSE_RS00055,NRI_RS00045,NHE_RS00060 | CDP-diacylglycerol--glycerol-3-phosphate 3-phosphatidyltransferase | Fatty acid and phospholipid metabolism   Biosynthesis |
| NSE_RS00185,NRI_RS00170,NHE_RS00180 | enoyl-(acyl-carrier-protein) reductase                             | Fatty acid and phospholipid metabolism   Biosynthesis |
| NSE_RS00675,NRI_RS00715,NHE_RS00660 | putative transporter                                               | Fatty acid and phospholipid metabolism   Biosynthesis |
| NSE_RS00980,NRI_RS01020,NHE_RS00980 | putative CDP-diacylglycerol--serine O-phosphatidyltransferase      | Fatty acid and phospholipid metabolism   Biosynthesis |
| NSE_RS01650,NRI_RS01700,NHE_RS01700 | 1-acyl-sn-glycerol-3-phosphate acyltransferase family protein      | Fatty acid and phospholipid metabolism   Biosynthesis |
| NSE_RS01820,NRI_RS01860,NHE_RS01865 | acyl carrier protein                                               | Fatty acid and phospholipid metabolism   Biosynthesis |
| NSE_RS01825,NRI_RS01865,NHE_RS01870 | 3-oxoacyl-(acyl-carrier-protein) synthase II                       | Fatty acid and phospholipid metabolism   Biosynthesis |
| NSE_RS02235,NRI_RS02280,NHE_RS02315 | enoyl-(acyl-carrier-protein) reductase II                          | Fatty acid and phospholipid metabolism   Biosynthesis |
| NSE_RS02565,NRI_RS02625,NHE_RS02680 | 3-oxoacyl-(acyl-carrier-protein) synthase III                      | Fatty acid and phospholipid metabolism   Biosynthesis |
| NSE_RS02570,NRI_RS02635,NHE_RS02685 | fatty acid/phospholipid synthesis protein PlsX                     | Fatty acid and phospholipid metabolism   Biosynthesis |
| NSE_RS02675,NRI_RS02765,NHE_RS02785 | beta-hydroxyacyl-[acyl carrier protein] dehydratase FabZ           | Fatty acid and phospholipid metabolism   Biosynthesis |
| NSE_RS03840,NRI_RS03920,NHE_RS04035 | putative phosphatidate cytidyltransferase                          | Fatty acid and phospholipid metabolism   Biosynthesis |
| NSE_RS03910,NRI_RS03990,NHE_RS04115 | malonyl CoA-acyl carrier protein transacylase                      | Fatty acid and phospholipid metabolism   Biosynthesis |
| NSE_RS03920,NRI_RS04000,NHE_RS04125 | holo-(acyl-carrier protein) synthase                               | Fatty acid and phospholipid metabolism   Biosynthesis |
| NSE_RS00900,NRI_RS00940,NHE_RS00895 | putative phosphatidylglycerophosphatase A                          | Fatty acid and phospholipid metabolism   Degradation  |
| NSE_RS00970,NRI_RS01010,NHE_RS00970 | conserved hypothetical protein                                     | Fatty acid and phospholipid metabolism   Degradation  |



|                                     |                                                       |                                                                                                                    |
|-------------------------------------|-------------------------------------------------------|--------------------------------------------------------------------------------------------------------------------|
| NSE_RS01200,NRI_RS01245,NHE_RS01205 | phosphatidylglycerophosphatase A                      | Fatty acid and phospholipid metabolism   Degradation                                                               |
| NSE_RS03230,NRI_RS03310,NHE_RS03390 | propionyl-CoA carboxylase, beta subunit               | Fatty acid and phospholipid metabolism   Degradation                                                               |
| NSE_RS03535,NRI_RS03615,NHE_RS03700 | patatin-like phospholipase family protein             | Fatty acid and phospholipid metabolism   Degradation                                                               |
| <b>Protein Fate</b>                 |                                                       |                                                                                                                    |
| <b>Sec-dependent pathway:</b>       |                                                       |                                                                                                                    |
| NSE_RS02215,NRI_RS02260,NHE_RS02295 | signal recognition particle protein SRP               | Protein fate   Protein and peptide secretion and trafficking                                                       |
| NSE_RS02240,NRI_RS02285,NHE_RS02320 | signal recognition particle-docking protein FtsY      | Protein fate   Protein and peptide secretion and trafficking                                                       |
| NSE_RS00925,NRI_RS00965,NHE_RS00920 | preprotein translocase, SecA subunit                  | Protein fate   Protein and peptide secretion and trafficking                                                       |
| NSE_RS01475,NRI_RS01525,NHE_RS01515 | putative protein-export protein SecB                  | Protein fate   Protein and peptide secretion and trafficking                                                       |
| NSE_RS02765,NRI_RS02855,NHE_RS02885 | preprotein translocase, SecE subunit                  | Protein fate   Protein and peptide secretion and trafficking                                                       |
| NSE_RS01165,NRI_RS01210,NHE_RS01170 | preprotein translocase, SecY subunit                  | Protein fate   Protein and peptide secretion and trafficking                                                       |
| NSE_RS03565,NRI_RS03645,NHE_RS03730 | preprotein translocase, SecG subunit                  | Protein fate   Protein and peptide secretion and trafficking                                                       |
| NSE_RS01700,NRI_RS01745,NHE_RS01745 | putative protein-export membrane protein SecF         | Protein fate   Protein and peptide secretion and trafficking                                                       |
| NSE_RS02550,NRI_RS02610,NHE_RS02655 | protein-export membrane protein SecD                  | Protein fate   Protein and peptide secretion and trafficking                                                       |
| NSE_RS01325,NRI_RS01375,NHE_RS01335 | preprotein translocase, YajC subunit                  | Protein fate   Protein and peptide secretion and trafficking                                                       |
| <b>Tat pathway:</b>                 |                                                       |                                                                                                                    |
| NSE_RS01950,NRI_RS01995,NHE_RS02000 | twin-arginine translocation protein, TatA/E family    | Protein fate   Protein and peptide secretion and trafficking                                                       |
| NSE_RS02090,NRI_RS02135,NHE_RS02160 | twin-arginine translocation protein, TatB             | Protein fate   Protein and peptide secretion and trafficking                                                       |
| NSE_RS00495,NRI_RS00540,NHE_RS00490 | Sec-independent protein translocase TatC              | Protein fate   Protein and peptide secretion and trafficking                                                       |
| <b>T1SS:</b>                        |                                                       |                                                                                                                    |
| NSE_RS03825,NRI_RS03905,NHE_RS04020 | type I secretion membrane fusion protein, HlyD family | Protein fate   Protein and peptide secretion and trafficking                                                       |
| NSE_RS00180,NRI_RS00165,NHE_RS00175 | type I secretion system ATPase HlyB                   | Protein fate   Protein and peptide secretion and trafficking                                                       |
| NSE_RS03240,NRI_RS03320,NHE_RS03400 | outer membrane efflux protein TolC                    | Protein fate   Protein and peptide secretion and trafficking    Transport and binding proteins   Unknown substrate |
| <b>T4SS:</b>                        |                                                       |                                                                                                                    |
| NSE_RS03000,NRI_RS03090,NHE_RS03145 | type IV secretion system protein VirD4                | Protein fate   Protein and peptide secretion and trafficking                                                       |
| NSE_RS03005,NRI_RS03095,NHE_RS03150 | type IV secretion system protein VirB11               | Protein fate   Protein and peptide secretion and trafficking                                                       |
| NSE_RS03010,NRI_RS03100,NHE_RS03155 | type IV secretion system protein VirB10               | Protein fate   Protein and peptide secretion and trafficking                                                       |
| NSE_RS03015,NRI_RS03105,NHE_RS03160 | type IV secretion system protein VirB9 (VirB9-1)      | Protein fate   Protein and peptide secretion and trafficking                                                       |
| NSE_RS03020,NRI_RS03110,NHE_RS03165 | type IV secretion system protein VirB8 (VirB8-1)      | Protein fate   Protein and peptide secretion and trafficking                                                       |
| NSE_RS03120,NRI_RS03205,NHE_RS03270 | type IV secretion system protein VirB4 (VirB4-2)      | Protein fate   Protein and peptide secretion and trafficking                                                       |
| NSE_RS03125,NRI_RS03210,NHE_RS03285 | type IV secretion system protein VirB2 (VirB2-2)      | Protein fate   Protein and peptide secretion and trafficking                                                       |
| NSE_RS03130,NRI_RS03215,NHE_RS03285 | type IV secretion system protein VirB2 (VirB2-1)      | Protein fate   Protein and peptide secretion and trafficking                                                       |
| NSE_RS00825,NRI_RS00865,NHE_RS00820 | type IV secretion system protein VirB9 (VirB9-2)      | Protein fate   Protein and peptide secretion and trafficking                                                       |

|                                                                                     |                                                          |                                                                     |
|-------------------------------------------------------------------------------------|----------------------------------------------------------|---------------------------------------------------------------------|
| NSE_RS00830,NRI_RS00870,NHE_RS00825                                                 | type IV secretion system protein VirB8 (VirB8-2)         | Protein fate   Protein and peptide secretion and trafficking        |
| NSE_RS03500,NRI_RS03580,NHE_RS03665                                                 | type IV secretion system protein, VirB6 family (VirB6-4) | Protein fate   Protein and peptide secretion and trafficking        |
| NSE_RS03505,NRI_RS03585,NHE_RS03670                                                 | type IV secretion system protein, VirB6 family (VirB6-3) | Protein fate   Protein and peptide secretion and trafficking        |
| NSE_RS03510,NRI_RS03590,NHE_RS03675                                                 | type IV secretion system protein, VirB6 family (VirB6-2) | Protein fate   Protein and peptide secretion and trafficking        |
| NSE_RS03515,NRI_RS03595,NHE_RS03680                                                 | type IV secretion system protein VirB6 (VirB6-1)         | Protein fate   Protein and peptide secretion and trafficking        |
| NSE_RS03520,NRI_RS03600,NHE_RS03685                                                 | type IV secretion system protein VirB4 (VirB4-1)         | Protein fate   Protein and peptide secretion and trafficking        |
| NSE_RS04020,NRI_RS04090,NHE_RS03236                                                 | type IV secretion system protein VirB7                   | Protein fate   Protein and peptide secretion and trafficking        |
| NSE_RS03525,NRI_RS03605,NHE_RS03690                                                 | type IV secretion system protein VirB3                   | Protein fate   Protein and peptide secretion and trafficking        |
| <b>Chaperones:</b>                                                                  |                                                          |                                                                     |
| NSE_RS02605,NRI_RS02675,NHE_RS02725                                                 | 60 kDa chaperonin GroEL                                  | Protein fate   Protein folding and stabilization                    |
| NSE_RS02610,NRI_RS02680,NHE_RS02730                                                 | 10 kDa chaperonin GroES                                  | Protein fate   Protein folding and stabilization                    |
| NSE_RS02190,NRI_RS02235,NHE_RS02270                                                 | chaperone protein DnaJ                                   | Protein fate   Protein folding and stabilization                    |
| NSE_RS03330,NRI_RS03410,NHE_RS03495                                                 | DnaJ domain protein                                      | Protein fate   Protein folding and stabilization                    |
| NSE_RS00085,NRI_RS00075,NHE_RS00095                                                 | chaperone protein DnaK                                   | Protein fate   Protein folding and stabilization                    |
| NSE_RS01235,NRI_RS01280,NHE_RS01240                                                 | putative chaperone protein HscB                          | Protein fate   Protein folding and stabilization                    |
| NSE_RS00835,NRI_RS00875,NHE_RS00830                                                 | co-chaperone GrpE                                        | Protein fate   Protein folding and stabilization                    |
| NSE_RS02000,NRI_RS02040,NHE_RS02045                                                 | heat shock protein HtpG                                  | Protein fate   Protein folding and stabilization                    |
| NSE_RS01230,NRI_RS01275,NHE_RS01235                                                 | putative chaperone protein HscA                          | Protein fate   Protein folding and stabilization                    |
| <b>Other functions:</b>                                                             |                                                          |                                                                     |
| NSE_RS00630,NRI_RS00670,NHE_RS00615,NHE_RS00620                                     | HflK protein                                             | Protein fate   Degradation of proteins, peptides, and glycopeptides |
| NSE_RS00635,NRI_RS00675,NHE_RS00620                                                 | HflC protein                                             | Protein fate   Degradation of proteins, peptides, and glycopeptides |
| NSE_RS00680,NRI_RS00720,NHE_RS00670,NHE_RS03895,NRI_RS03805,NRI_RS03800,NHE_RS03890 | peptidase, M16 family                                    | Protein fate   Degradation of proteins, peptides, and glycopeptides |
| NSE_RS00940,NRI_RS00980,NHE_RS00935                                                 | putative metalloendopeptidase, glycoprotease family      | Protein fate   Degradation of proteins, peptides, and glycopeptides |
| NSE_RS01440,NRI_RS01490,NHE_RS01475                                                 | ATP-dependent protease La                                | Protein fate   Degradation of proteins, peptides, and glycopeptides |
| NSE_RS01660,NRI_RS01710,NHE_RS01710                                                 | signal peptide peptidase SppA, 36K type                  | Protein fate   Degradation of proteins, peptides, and glycopeptides |
| NSE_RS01720,NRI_RS01760,NHE_RS01760                                                 | ATP-dependent metalloprotease FtsH                       | Protein fate   Degradation of proteins, peptides, and glycopeptides |
| NSE_RS01900,NRI_RS01945,NHE_RS01950                                                 | metallopeptidase, M24 family                             | Protein fate   Degradation of proteins, peptides, and glycopeptides |
| NSE_RS01920,NRI_RS01965,NHE_RS01970                                                 | cytosol aminopeptidase                                   | Protein fate   Degradation of proteins, peptides, and glycopeptides |
| NSE_RS02920,NRI_RS03010,NHE_RS03045                                                 | putative membrane-associated zinc metalloprotease        | Protein fate   Degradation of proteins, peptides, and glycopeptides |
| NSE_RS03055,NRI_RS03145,NHE_RS03210                                                 | ATP-dependent Clp protease, proteolytic subunit ClpP     | Protein fate   Degradation of proteins, peptides, and glycopeptides |
| NSE_RS03435,NRI_RS03515,NHE_RS03600                                                 | glycoprotease family protein                             | Protein fate   Degradation of proteins, peptides, and glycopeptides |
| NSE_RS03720,NRI_RS03800,NHE_RS03890,NHE_RS00670,NRI_RS00720                         | peptidase, M16 family                                    | Protein fate   Degradation of proteins, peptides, and glycopeptides |
| NSE_RS03725,NRI_RS03805,NHE_RS03895                                                 | peptidase, M16 family                                    | Protein fate   Degradation of proteins, peptides, and glycopeptides |

|                                                                                                                                     |                                                                |                                                                     |
|-------------------------------------------------------------------------------------------------------------------------------------|----------------------------------------------------------------|---------------------------------------------------------------------|
| NSE_RS03735,NRI_RS03815,NHE_RS03905                                                                                                 | putative carboxypeptidase                                      | Protein fate   Degradation of proteins, peptides, and glycopeptides |
| NSE_RS01310,NRI_RS01360,NHE_RS01315,NHE_RS02955,NRI_RS02925,NHE_RS01995,NRI_RS01990,NHE_RS03450,NRI_RS03360,NRI_RS03610,NHE_RS02960 | putative lipoprotein releasing system ATP-binding protein LolD | Protein fate   Protein and peptide secretion and trafficking        |
| NSE_RS01665,NRI_RS01715,NHE_RS01715,NRI_RS03610,NHE_RS03695,NHE_RS01315,NHE_RS02955,NRI_RS03360,NHE_RS03450                         | putative ABC transporter, ATP-binding/permease protein         | Protein fate   Protein and peptide secretion and trafficking        |
| NSE_RS01945,NRI_RS01990,NHE_RS01995,NHE_RS03450,NRI_RS01360,NRI_RS01715,NHE_RS03695                                                 | ABC transporter, ATP-binding protein                           | Protein fate   Protein and peptide secretion and trafficking        |
| NSE_RS02835,NRI_RS02925,NHE_RS02955,NRI_RS01990,NHE_RS03450,NRI_RS03360,NHE_RS01315,NHE_RS01995,NRI_RS01360,NHE_RS03695,NRI_RS03610 | ABC transporter, ATP-binding protein                           | Protein fate   Protein and peptide secretion and trafficking        |
| NSE_RS02885,NRI_RS02975,NHE_RS03010                                                                                                 | conserved hypothetical protein                                 | Protein fate   Protein and peptide secretion and trafficking        |
| NSE_RS02915,NRI_RS03005,NHE_RS03040                                                                                                 | outer membrane protein, OMP85 family                           | Protein fate   Protein and peptide secretion and trafficking        |
| NSE_RS03175,NRI_RS03260,NHE_RS03335                                                                                                 | signal peptidase I                                             | Protein fate   Protein and peptide secretion and trafficking        |
| NSE_RS03285,NRI_RS03360,NHE_RS03450,NRI_RS01990,NHE_RS01995,NHE_RS02955,NRI_RS02925,NHE_RS01315,NHE_RS03695,NRI_RS01360,NRI_RS03610 | putative phosphate ABC transporter, ATP-binding protein        | Protein fate   Protein and peptide secretion and trafficking        |
| NSE_RS03530,NRI_RS03610,NHE_RS03695,NHE_RS01715,NHE_RS00175,NRI_RS00165,NRI_RS01715,NHE_RS01995,NRI_RS02925,NRI_RS03360,NHE_RS02955 | putative ABC transporter, ATP-binding protein/permease protein | Protein fate   Protein and peptide secretion and trafficking        |
| NSE_RS03730,NRI_RS03810,NHE_RS03900                                                                                                 | signal peptidase II                                            | Protein fate   Protein and peptide secretion and trafficking        |
| NSE_RS00455,NRI_RS00500,NHE_RS00450,NHE_RS01305,NHE_RS01305,NRI_RS01350                                                             | ClpB protein                                                   | Protein fate   Protein folding and stabilization                    |
| NSE_RS00640,NRI_RS00680,NHE_RS00625                                                                                                 | periplasmic serine protease, DO/DeqQ family                    | Protein fate   Protein folding and stabilization                    |
| NSE_RS00685,NRI_RS00725,NHE_RS00675                                                                                                 | heat shock protein HslVU, HslV subunit                         | Protein fate   Protein folding and stabilization                    |
| NSE_RS00690,NRI_RS00730,NHE_RS00680,NHE_RS03215,NHE_RS03215,NRI_RS03150,NRI_RS03150                                                 | heat shock protein HslVU, ATPase subunit HslU                  | Protein fate   Protein folding and stabilization                    |
| NSE_RS01300,NRI_RS01350,NHE_RS01305,NHE_RS00450,NHE_RS00450,NRI_RS00500                                                             | ATP-dependent Clp protease, ATP-binding subunit ClpA           | Protein fate   Protein folding and stabilization                    |
| NSE_RS01410,NRI_RS04070,NHE_RS01440                                                                                                 | disulfide bond formation protein, DsbB family                  | Protein fate   Protein folding and stabilization                    |
| NSE_RS02620,NRI_RS02690,NHE_RS02740                                                                                                 | rotamase family protein                                        | Protein fate   Protein folding and stabilization                    |
| NSE_RS03050,NRI_RS03140,NHE_RS03205                                                                                                 | putative trigger factor                                        | Protein fate   Protein folding and stabilization                    |
| NSE_RS03060,NRI_RS03150,NHE_RS03215,NHE_RS00680,NHE_RS00680,NRI_RS00730                                                             | ATP-dependent Clp protease, ATP-binding subunit ClpX           | Protein fate   Protein folding and stabilization                    |
| NSE_RS03470,NRI_RS03550,NHE_RS03630                                                                                                 | peptidyl-prolyl cis-trans isomerase, cyclophilin-type          | Protein fate   Protein folding and stabilization                    |
| NSE_RS03600,NRI_RS03685,NHE_RS03765                                                                                                 | conserved hypothetical protein                                 | Protein fate   Protein folding and stabilization                    |
| NSE_RS01400,NRI_RS01450,NHE_RS01425                                                                                                 | methionine aminopeptidase, type I                              | Protein fate   Protein modification and repair                      |
| NSE_RS01585,NRI_RS01635,NHE_RS01635                                                                                                 | peptide deformylase                                            | Protein fate   Protein modification and repair                      |
| NSE_RS02010,NRI_RS02055,NHE_RS02065                                                                                                 | apolipoprotein N-acyltransferase                               | Protein fate   Protein modification and repair                      |
| NSE_RS02810,NRI_RS02900,NHE_RS02930                                                                                                 | biotin--acetyl-CoA-carboxylase ligase                          | Protein fate   Protein modification and repair                      |
| NSE_RS03485,NRI_RS03565,NHE_RS03645                                                                                                 | prolipoprotein diacylglycerol transferase                      | Protein fate   Protein modification and repair                      |
| NSE_RS03680,NRI_RS03765,NHE_RS03845                                                                                                 | disulfide oxidoreductase                                       | Protein fate   Protein modification and repair                      |

|                                                                 |                              |                                                                       |
|-----------------------------------------------------------------|------------------------------|-----------------------------------------------------------------------|
| NSE_RS00890,NRI_RS00930,NHE_RS00885,<br>NRI_RS02305             | TldD protein                 | Protein fate   Other                                                  |
| NSE_RS02260,NRI_RS02305,NHE_RS02340,<br>NHE_RS00885,NRI_RS00930 | pmbA protein                 | Protein fate   Other                                                  |
| <b><u>Protein synthesis</u></b>                                 |                              |                                                                       |
| NSE_RS01270,NRI_RS01315,NHE_RS01275                             | peptidyl-tRNA hydrolase      | Protein synthesis   Other                                             |
| NSE_RS01795,NRI_RS01835,NHE_RS03870,<br>NRI_RS03790             | GTP-binding protein Obg/CgtA | Protein synthesis   Other                                             |
| NSE_RS03295,NRI_RS03375,NHE_RS03460                             | SsrA-binding protein         | Protein synthesis   Other                                             |
| NSE_RS03705,NRI_RS03790,NHE_RS03870,<br>NRI_RS01835             | GTP-binding protein YchF     | Protein synthesis   Other                                             |
| NSE_RS00275,NRI_RS00265,NHE_RS00275                             | ribosomal protein S18        | Protein synthesis   Ribosomal proteins:<br>synthesis and modification |
| NSE_RS00845,NRI_RS00885,NHE_RS00840                             | ribosomal protein L35        | Protein synthesis   Ribosomal proteins:<br>synthesis and modification |
| NSE_RS00260,NRI_RS00250,NHE_RS00260                             | ribosomal protein S15        | Protein synthesis   Ribosomal proteins:<br>synthesis and modification |
| NSE_RS00270,NRI_RS00260,NHE_RS00270                             | ribosomal protein L9         | Protein synthesis   Ribosomal proteins:<br>synthesis and modification |
| NSE_RS00280,NRI_RS00270,NHE_RS00280                             | ribosomal protein S6         | Protein synthesis   Ribosomal proteins:<br>synthesis and modification |
| NSE_RS00475,NRI_RS00520,NHE_RS00470                             | ribosomal protein S16        | Protein synthesis   Ribosomal proteins:<br>synthesis and modification |
| NSE_RS00850,NRI_RS00890,NHE_RS00845                             | ribosomal protein L20        | Protein synthesis   Ribosomal proteins:<br>synthesis and modification |
| NSE_RS01030,NRI_RS01070,NHE_RS01030                             | ribosomal protein L33        | Protein synthesis   Ribosomal proteins:<br>synthesis and modification |
| NSE_RS01065,NRI_RS01110,NHE_RS01070                             | ribosomal protein S10        | Protein synthesis   Ribosomal proteins:<br>synthesis and modification |
| NSE_RS01070,NRI_RS01115,NHE_RS01075                             | ribosomal protein L3         | Protein synthesis   Ribosomal proteins:<br>synthesis and modification |
| NSE_RS01075,NRI_RS01120,NHE_RS01080                             | ribosomal protein L4         | Protein synthesis   Ribosomal proteins:<br>synthesis and modification |
| NSE_RS01080,NRI_RS01125,NHE_RS01085                             | ribosomal protein L23        | Protein synthesis   Ribosomal proteins:<br>synthesis and modification |
| NSE_RS01085,NRI_RS01130,NHE_RS01090                             | ribosomal protein L2         | Protein synthesis   Ribosomal proteins:<br>synthesis and modification |
| NSE_RS01090,NRI_RS01135,NHE_RS01095                             | ribosomal protein S19        | Protein synthesis   Ribosomal proteins:<br>synthesis and modification |
| NSE_RS01095,NRI_RS01140,NHE_RS01100                             | ribosomal protein L22        | Protein synthesis   Ribosomal proteins:<br>synthesis and modification |
| NSE_RS01100,NRI_RS01145,NHE_RS01105                             | ribosomal protein S3         | Protein synthesis   Ribosomal proteins:<br>synthesis and modification |
| NSE_RS01105,NRI_RS01150,NHE_RS01110                             | ribosomal protein L16        | Protein synthesis   Ribosomal proteins:<br>synthesis and modification |
| NSE_RS01115,NRI_RS01160,NHE_RS01120                             | ribosomal protein S17        | Protein synthesis   Ribosomal proteins:<br>synthesis and modification |
| NSE_RS01120,NRI_RS01165,NHE_RS01125                             | ribosomal protein L14        | Protein synthesis   Ribosomal proteins:<br>synthesis and modification |
| NSE_RS01125,NRI_RS01170,NHE_RS01130                             | ribosomal protein L24        | Protein synthesis   Ribosomal proteins:<br>synthesis and modification |
| NSE_RS01130,NRI_RS01175,NHE_RS01135                             | ribosomal protein L5         | Protein synthesis   Ribosomal proteins:<br>synthesis and modification |
| NSE_RS01135,NRI_RS01180,NHE_RS01140                             | ribosomal protein S14        | Protein synthesis   Ribosomal proteins:<br>synthesis and modification |
| NSE_RS01140,NRI_RS01185,NHE_RS01145                             | ribosomal protein S8         | Protein synthesis   Ribosomal proteins:<br>synthesis and modification |
| NSE_RS01145,NRI_RS01190,NHE_RS01150                             | ribosomal protein L6         | Protein synthesis   Ribosomal proteins:<br>synthesis and modification |
| NSE_RS01150,NHE_RS01155,NRI_RS01195                             | ribosomal protein L18        | Protein synthesis   Ribosomal proteins:<br>synthesis and modification |
| NSE_RS01155,NRI_RS01200,NHE_RS01160                             | ribosomal protein S5         | Protein synthesis   Ribosomal proteins:<br>synthesis and modification |
| NSE_RS01160,NRI_RS01205,NHE_RS01165                             | ribosomal protein L15        | Protein synthesis   Ribosomal proteins:<br>synthesis and modification |

|                                                                                                                                                 |                                                      |                                                                    |
|-------------------------------------------------------------------------------------------------------------------------------------------------|------------------------------------------------------|--------------------------------------------------------------------|
| NSE_RS01175,NRI_RS01220,NHE_RS01180                                                                                                             | ribosomal protein S13                                | Protein synthesis   Ribosomal proteins: synthesis and modification |
| NSE_RS01180,NRI_RS01225,NHE_RS01185                                                                                                             | ribosomal protein S11                                | Protein synthesis   Ribosomal proteins: synthesis and modification |
| NSE_RS01190,NRI_RS01235,NHE_RS01195                                                                                                             | ribosomal protein L17                                | Protein synthesis   Ribosomal proteins: synthesis and modification |
| NSE_RS01265,NRI_RS01310,NHE_RS01270                                                                                                             | ribosomal 5S rRNA E-loop binding protein Ctc/L25/TL5 | Protein synthesis   Ribosomal proteins: synthesis and modification |
| NSE_RS01335,NRI_RS01385,NHE_RS01345                                                                                                             | ribosomal protein L28                                | Protein synthesis   Ribosomal proteins: synthesis and modification |
| NSE_RS01655,NRI_RS01705,NHE_RS01705                                                                                                             | ribosomal protein S1                                 | Protein synthesis   Ribosomal proteins: synthesis and modification |
| NSE_RS02040,NRI_RS02085,NHE_RS02095                                                                                                             | conserved hypothetical protein                       | Protein synthesis   Ribosomal proteins: synthesis and modification |
| NSE_RS02395,NRI_RS02450,NHE_RS02490                                                                                                             | ribosomal protein S4                                 | Protein synthesis   Ribosomal proteins: synthesis and modification |
| NSE_RS02740,NRI_RS02830,NHE_RS02860                                                                                                             | ribosomal protein L7/L12                             | Protein synthesis   Ribosomal proteins: synthesis and modification |
| NSE_RS02745,NRI_RS02835,NHE_RS02865                                                                                                             | 50S ribosomal protein L10                            | Protein synthesis   Ribosomal proteins: synthesis and modification |
| NSE_RS02750,NRI_RS02840,NHE_RS02870                                                                                                             | ribosomal protein L1                                 | Protein synthesis   Ribosomal proteins: synthesis and modification |
| NSE_RS02755,NRI_RS02845,NHE_RS02875                                                                                                             | ribosomal protein L11                                | Protein synthesis   Ribosomal proteins: synthesis and modification |
| NSE_RS02785,NRI_RS02875,NHE_RS02905                                                                                                             | ribosomal protein S7                                 | Protein synthesis   Ribosomal proteins: synthesis and modification |
| NSE_RS02790,NRI_RS02880,NHE_RS02910                                                                                                             | ribosomal protein S12                                | Protein synthesis   Ribosomal proteins: synthesis and modification |
| NSE_RS03210,NRI_RS03295,NHE_RS03370                                                                                                             | ribosomal protein S20                                | Protein synthesis   Ribosomal proteins: synthesis and modification |
| NSE_RS03370,NRI_RS03450,NHE_RS03550                                                                                                             | ribosomal protein S21                                | Protein synthesis   Ribosomal proteins: synthesis and modification |
| NSE_RS03410,NRI_RS03490,NHE_RS03575                                                                                                             | ribosomal protein S9                                 | Protein synthesis   Ribosomal proteins: synthesis and modification |
| NSE_RS03415,NRI_RS03495,NHE_RS03580                                                                                                             | ribosomal protein L13                                | Protein synthesis   Ribosomal proteins: synthesis and modification |
| NSE_RS03650,NRI_RS03735,NHE_RS03815                                                                                                             | ribosomal protein L19                                | Protein synthesis   Ribosomal proteins: synthesis and modification |
| NSE_RS03660,NRI_RS03745,NHE_RS03825                                                                                                             | ribosomal protein L27                                | Protein synthesis   Ribosomal proteins: synthesis and modification |
| NSE_RS03665,NRI_RS03750,NHE_RS03830                                                                                                             | ribosomal protein L21                                | Protein synthesis   Ribosomal proteins: synthesis and modification |
| NSE_RS00765,NRI_RS00805,NHE_RS00760                                                                                                             | translation elongation factor P                      | Protein synthesis   Translation factors                            |
| NSE_RS01205,NRI_RS01250,NHE_RS01210                                                                                                             | translation initiation factor IF-3                   | Protein synthesis   Translation factors                            |
| NSE_RS01425,NRI_RS01475,NHE_RS01460                                                                                                             | ribosomal subunit interface protein                  | Protein synthesis   Translation factors                            |
| NSE_RS01645,NRI_RS01695,NHE_RS01695,NHE_RS02565                                                                                                 | peptide chain release factor 1                       | Protein synthesis   Translation factors                            |
| NSE_RS02130,NRI_RS02175,NHE_RS02205,NRI_RS03220,NHE_RS03290,NRI_RS02805,NHE_RS02895,NRI_RS02865                                                 | translation initiation factor IF-2                   | Protein synthesis   Translation factors                            |
| NSE_RS02715,NRI_RS02805,NHE_RS02835,NHE_RS03290,NRI_RS03220,NHE_RS02895,NRI_RS02865,NHE_RS02900,NRI_RS02870,NRI_RS02870,NRI_RS02175,NHE_RS02205 | GTP-binding protein TypA                             | Protein synthesis   Translation factors                            |
| NSE_RS02775,NRI_RS02865,NHE_RS02895,NRI_RS02805,NHE_RS02835,NRI_RS03220,NRI_RS02175                                                             | translation elongation factor Tu                     | Protein synthesis   Translation factors                            |
| NSE_RS02780,NRI_RS02870,NHE_RS02900,NHE_RS02835,NHE_RS02835,NRI_RS02805,NRI_RS02805,NHE_RS03290,NHE_RS03290,NRI_RS03220,NRI_RS03220             | translation elongation factor G                      | Protein synthesis   Translation factors                            |
| NSE_RS03135,NRI_RS03220,NHE_RS03290,NHE_RS02835,NRI_RS02805,NHE_RS02900,NHE_RS02900,NRI_RS02870,NRI_RS02870,NHE_RS02205,NHE_RS02895,NRI_RS02175 | GTP-binding protein LepA                             | Protein synthesis   Translation factors                            |

|                                                                                                 |                                                              |                                                     |
|-------------------------------------------------------------------------------------------------|--------------------------------------------------------------|-----------------------------------------------------|
| NSE_RS03595,NRI_RS03675,NHE_RS03760                                                             | translation initiation factor IF-1                           | Protein synthesis   Translation factors             |
| NSE_RS03850,NRI_RS03930,NHE_RS04045                                                             | ribosome recycling factor                                    | Protein synthesis   Translation factors             |
| NSE_RS03860,NRI_RS03940,NHE_RS04055                                                             | translation elongation factor Ts                             | Protein synthesis   Translation factors             |
| NSE_RS00215,NRI_RS00200,NHE_RS00210                                                             | arginyl-tRNA synthetase                                      | Protein synthesis   tRNA aminoacylation             |
| NSE_RS00360,NRI_RS00355,NHE_RS00370                                                             | glutamyl-tRNA(Gln) amidotransferase, B subunit               | Protein synthesis   tRNA aminoacylation             |
| NSE_RS00385,NRI_RS00385,NHE_RS00385                                                             | methionyl-tRNA formyltransferase                             | Protein synthesis   tRNA aminoacylation             |
| NSE_RS00600,NRI_RS00640,NHE_RS00585                                                             | alanyl-tRNA synthetase                                       | Protein synthesis   tRNA aminoacylation             |
| NSE_RS00840,NRI_RS00880,NHE_RS00835                                                             | tryptophanyl-tRNA synthetase                                 | Protein synthesis   tRNA aminoacylation             |
| NSE_RS00855,NRI_RS00895,NHE_RS00850                                                             | phenylalanyl-tRNA synthetase, alpha subunit                  | Protein synthesis   tRNA aminoacylation             |
| NSE_RS01025,NRI_RS01065,NHE_RS01025                                                             | glutamyl-tRNA(Gln) amidotransferase, A subunit               | Protein synthesis   tRNA aminoacylation             |
| NSE_RS01210,NRI_RS01255,NHE_RS01215                                                             | threonyl-tRNA synthetase                                     | Protein synthesis   tRNA aminoacylation             |
| NSE_RS01380,NRI_RS01430,NHE_RS01390                                                             | cysteinyl-tRNA synthetase                                    | Protein synthesis   tRNA aminoacylation             |
| NSE_RS01430,NRI_RS01480,NHE_RS01465                                                             | tyrosyl-tRNA synthetase                                      | Protein synthesis   tRNA aminoacylation             |
| NSE_RS01500,NRI_RS01550,NHE_RS01540,NHE_RS01215                                                 | prolyl-tRNA synthetase                                       | Protein synthesis   tRNA aminoacylation             |
| NSE_RS01725,NRI_RS01765,NHE_RS01765                                                             | putative phenylalanyl-tRNA synthetase, beta subunit          | Protein synthesis   tRNA aminoacylation             |
| NSE_RS01930,NRI_RS01975,NHE_RS01980                                                             | aspartyl-tRNA synthetase                                     | Protein synthesis   tRNA aminoacylation             |
| NSE_RS02055,NRI_RS02100,NHE_RS02110,NHE_RS02560,NRI_RS02510                                     | leucyl-tRNA synthetase                                       | Protein synthesis   tRNA aminoacylation             |
| NSE_RS02100,NRI_RS02145,NHE_RS02170                                                             | putative glutamyl-tRNA(Gln) amidotransferase, C subunit      | Protein synthesis   tRNA aminoacylation             |
| NSE_RS02110,NHE_RS02180,NHE_RS03125,NRI_RS03080                                                 | glutamyl-tRNA synthetase                                     | Protein synthesis   tRNA aminoacylation             |
| NSE_RS02200,NRI_RS02245,NHE_RS02280,NRI_RS02510,NHE_RS02560                                     | isoleucyl-tRNA synthetase                                    | Protein synthesis   tRNA aminoacylation             |
| NSE_RS02335,NRI_RS02385,NHE_RS02425                                                             | seryl-tRNA synthetase                                        | Protein synthesis   tRNA aminoacylation             |
| NSE_RS02455,NRI_RS02510,NHE_RS02560,NHE_RS02560,NHE_RS02280,NRI_RS02245,NRI_RS02100,NHE_RS02110 | putative valyl-tRNA synthetase                               | Protein synthesis   tRNA aminoacylation             |
| NSE_RS02990,NRI_RS03080,NHE_RS03125,NHE_RS02180                                                 | glutamyl-tRNA synthetase                                     | Protein synthesis   tRNA aminoacylation             |
| NSE_RS03075,NRI_RS03160,NHE_RS03225                                                             | glycyl-tRNA synthetase, beta subunit                         | Protein synthesis   tRNA aminoacylation             |
| NSE_RS03080,NRI_RS03165,NHE_RS03230                                                             | glycyl-tRNA synthetase, alpha subunit                        | Protein synthesis   tRNA aminoacylation             |
| NSE_RS03140,NRI_RS03225,NHE_RS03295                                                             | lysyl-tRNA synthetase                                        | Protein synthesis   tRNA aminoacylation             |
| NSE_RS03160,NRI_RS03245,NHE_RS03315                                                             | histidyl-tRNA synthetase                                     | Protein synthesis   tRNA aminoacylation             |
| NSE_RS03640,NRI_RS03725,NHE_RS03805                                                             | methionyl-tRNA synthetase                                    | Protein synthesis   tRNA aminoacylation             |
| NSE_RS00080,NRI_RS00070,NHE_RS00085                                                             | queuine tRNA-ribosyltransferase                              | Protein synthesis   tRNA and rRNA base modification |
| NSE_RS00090,NRI_RS00080,NHE_RS00100                                                             | tRNA pseudouridine synthase A                                | Protein synthesis   tRNA and rRNA base modification |
| NSE_RS00405,NRI_RS00410,NHE_RS00410                                                             | tRNA pseudouridine synthase B                                | Protein synthesis   tRNA and rRNA base modification |
| NSE_RS00570,NRI_RS00610,NHE_RS00535,NHE_RS02370,NRI_RS02330                                     | ribosomal large subunit pseudouridine synthases, RluA family | Protein synthesis   tRNA and rRNA base modification |
| NSE_RS01050,NRI_RS01095,NHE_RS01055                                                             | RNA methyltransferase, TrmH family, group 3                  | Protein synthesis   tRNA and rRNA base modification |
| NSE_RS01485,NRI_RS01535,NHE_RS01525                                                             | dimethyladenosine transferase                                | Protein synthesis   tRNA and rRNA base modification |

|                                                                        |                                                                              |                                                                                                 |
|------------------------------------------------------------------------|------------------------------------------------------------------------------|-------------------------------------------------------------------------------------------------|
| NSE_RS01890,NRI_RS01935,NHE_RS01940                                    | tRNA (5-methylaminomethyl-2-thiouridylate)-methyltransferase                 | Protein synthesis   tRNA and rRNA base modification                                             |
| NSE_RS02245,NRI_RS02290,NHE_RS02325                                    | ribosomal RNA large subunit methyltransferase J                              | Protein synthesis   tRNA and rRNA base modification                                             |
| NSE_RS02285,NRI_RS02330,NHE_RS02370,NHE_RS00535,NRI_RS00610            | ribosomal large subunit pseudouridine synthase C                             | Protein synthesis   tRNA and rRNA base modification                                             |
| NSE_RS02340,NRI_RS02390,NHE_RS02430                                    | tRNA delta(2)-isopentenylpyrophosphate transferase                           | Protein synthesis   tRNA and rRNA base modification                                             |
| NSE_RS02870,NRI_RS02960,NHE_RS02995                                    | glucose inhibited division protein A                                         | Protein synthesis   tRNA and rRNA base modification                                             |
| NSE_RS03655,NRI_RS03740,NHE_RS03820                                    | tRNA (guanine-N1)-methyltransferase                                          | Protein synthesis   tRNA and rRNA base modification                                             |
| NSE_RS03870,NRI_RS03950,NHE_RS04065                                    | ubiquinone/menaquinone biosynthesis methyltransferase UbiE                   | Protein synthesis   tRNA and rRNA base modification                                             |
| <b>Purines, pyrimidines, nucleosides, and nucleotides biosynthesis</b> |                                                                              |                                                                                                 |
| NSE_RS00625,NRI_RS00665,NHE_RS00610                                    | thymidylate synthase, flavin-dependent                                       | Purines, pyrimidines, nucleosides, and nucleotides   2'-Deoxyribonucleotide metabolism          |
| NSE_RS01670,NRI_RS01720,NHE_RS01720                                    | ribonucleoside-diphosphate reductase, alpha subunit                          | Purines, pyrimidines, nucleosides, and nucleotides   2'-Deoxyribonucleotide metabolism          |
| NSE_RS02120,NRI_RS02165,NHE_RS02190                                    | ribonucleoside-diphosphate reductase, beta subunit                           | Purines, pyrimidines, nucleosides, and nucleotides   2'-Deoxyribonucleotide metabolism          |
| NSE_RS03895,NRI_RS03975,NHE_RS04095                                    | deoxyuridine 5'triphosphate nucleotidohydrolase                              | Purines, pyrimidines, nucleosides, and nucleotides   2'-Deoxyribonucleotide metabolism          |
| NSE_RS03930,NRI_RS04010,NHE_RS04140                                    | putative deoxycytidine triphosphate deaminase                                | Purines, pyrimidines, nucleosides, and nucleotides   2'-Deoxyribonucleotide metabolism          |
| NSE_RS01170,NRI_RS01215,NHE_RS01175                                    | adenylate kinase                                                             | Purines, pyrimidines, nucleosides, and nucleotides   Nucleotide and nucleoside interconversions |
| NSE_RS01850,NRI_RS01890,NHE_RS01895                                    | putative deoxyguanosinetriphosphate triphosphohydrolase                      | Purines, pyrimidines, nucleosides, and nucleotides   Nucleotide and nucleoside interconversions |
| NSE_RS02250,NRI_RS02295,NHE_RS02330                                    | thymidylate kinase                                                           | Purines, pyrimidines, nucleosides, and nucleotides   Nucleotide and nucleoside interconversions |
| NSE_RS02300,NRI_RS02345,NHE_RS02390                                    | nucleoside diphosphate kinase                                                | Purines, pyrimidines, nucleosides, and nucleotides   Nucleotide and nucleoside interconversions |
| NSE_RS02950,NRI_RS03040,NHE_RS03075                                    | guanylate kinase                                                             | Purines, pyrimidines, nucleosides, and nucleotides   Nucleotide and nucleoside interconversions |
| NSE_RS03855,NRI_RS03935,NHE_RS04050                                    | uridylate kinase                                                             | Purines, pyrimidines, nucleosides, and nucleotides   Nucleotide and nucleoside interconversions |
| NSE_RS00130,NRI_RS00115,NHE_RS00125                                    | phosphoribosylformylglycinamide cycloligase                                  | Purines, pyrimidines, nucleosides, and nucleotides   Purine ribonucleotide biosynthesis         |
| NSE_RS00265,NRI_RS00255,NHE_RS00265                                    | adenylosuccinate lyase                                                       | Purines, pyrimidines, nucleosides, and nucleotides   Purine ribonucleotide biosynthesis         |
| NSE_RS00725,NRI_RS00760,NHE_RS00715                                    | phosphoribosylaminoimidazolecarboxamide formyltransferase/IMP cyclohydrolase | Purines, pyrimidines, nucleosides, and nucleotides   Purine ribonucleotide biosynthesis         |
| NSE_RS00755,NRI_RS00795,NHE_RS00750,NHE_RS02150                        | amidophosphoribosyltransferase                                               | Purines, pyrimidines, nucleosides, and nucleotides   Purine ribonucleotide biosynthesis         |
| NSE_RS00895,NRI_RS00935,NHE_RS00890                                    | adenylosuccinate synthetase                                                  | Purines, pyrimidines, nucleosides, and nucleotides   Purine ribonucleotide biosynthesis         |
| NSE_RS00935,NRI_RS00975,NHE_RS00930                                    | phosphoribosylaminoimidazole carboxylase, catalytic subunit                  | Purines, pyrimidines, nucleosides, and nucleotides   Purine ribonucleotide biosynthesis         |

|                                     |                                                          |                                                                                             |
|-------------------------------------|----------------------------------------------------------|---------------------------------------------------------------------------------------------|
| NSE_RS01445,NRI_RS01495,NHE_RS01480 | conserved hypothetical protein                           | Purines, pyrimidines, nucleosides, and nucleotides   Purine ribonucleotide biosynthesis     |
| NSE_RS01810,NRI_RS01850,NHE_RS01855 | putative phosphoribosylformylglycinamide synthase I      | Purines, pyrimidines, nucleosides, and nucleotides   Purine ribonucleotide biosynthesis     |
| NSE_RS01915,NRI_RS01960,NHE_RS01965 | phosphoribosylglycinamide formyltransferase              | Purines, pyrimidines, nucleosides, and nucleotides   Purine ribonucleotide biosynthesis     |
| NSE_RS02145,NRI_RS02190,NHE_RS02220 | inosine-5'-monophosphate dehydrogenase                   | Purines, pyrimidines, nucleosides, and nucleotides   Purine ribonucleotide biosynthesis     |
| NSE_RS03300,NRI_RS03380,NHE_RS03465 | putative phosphoribosylformylglycinamide synthase II     | Purines, pyrimidines, nucleosides, and nucleotides   Purine ribonucleotide biosynthesis     |
| NSE_RS03320,NRI_RS03400,NHE_RS03485 | ribose-phosphate pyrophosphokinase                       | Purines, pyrimidines, nucleosides, and nucleotides   Purine ribonucleotide biosynthesis     |
| NSE_RS03475,NRI_RS03555,NHE_RS03635 | phosphoribosylaminoimidazole-succinocarboxamide synthase | Purines, pyrimidines, nucleosides, and nucleotides   Purine ribonucleotide biosynthesis     |
| NSE_RS03610,NRI_RS03695,NHE_RS03775 | GMP synthase                                             | Purines, pyrimidines, nucleosides, and nucleotides   Purine ribonucleotide biosynthesis     |
| NSE_RS03770,NRI_RS03855,NHE_RS03945 | phosphoribosylamine--glycine ligase                      | Purines, pyrimidines, nucleosides, and nucleotides   Purine ribonucleotide biosynthesis     |
| NSE_RS03935,NRI_RS04015,NHE_RS04150 | phosphoribosylaminoimidazole carboxylase, ATPase subunit | Purines, pyrimidines, nucleosides, and nucleotides   Purine ribonucleotide biosynthesis     |
| NSE_RS00595,NRI_RS00635,NHE_RS00580 | dihydroorotase, multifunctional complex type             | Purines, pyrimidines, nucleosides, and nucleotides   Pyrimidine ribonucleotide biosynthesis |
| NSE_RS00700,NRI_RS00740,NHE_RS00690 | dihydroorotate dehydrogenase                             | Purines, pyrimidines, nucleosides, and nucleotides   Pyrimidine ribonucleotide biosynthesis |
| NSE_RS00880,NRI_RS00920,NHE_RS00875 | carbamoyl-phosphate synthase, large subunit              | Purines, pyrimidines, nucleosides, and nucleotides   Pyrimidine ribonucleotide biosynthesis |
| NSE_RS02035,NRI_RS02080,NHE_RS02090 | carbamoyl-phosphate synthase, small subunit              | Purines, pyrimidines, nucleosides, and nucleotides   Pyrimidine ribonucleotide biosynthesis |
| NSE_RS02075,NRI_RS02120,NHE_RS02130 | aspartate carbamoyltransferase                           | Purines, pyrimidines, nucleosides, and nucleotides   Pyrimidine ribonucleotide biosynthesis |
| NSE_RS02205,NRI_RS02250,NHE_RS02285 | orotate phosphoribosyltransferase                        | Purines, pyrimidines, nucleosides, and nucleotides   Pyrimidine ribonucleotide biosynthesis |
| NSE_RS03215,NRI_RS03300,NHE_RS03380 | orotidine 5'-phosphate decarboxylase                     | Purines, pyrimidines, nucleosides, and nucleotides   Pyrimidine ribonucleotide biosynthesis |
| NSE_RS03570,NRI_RS03650,NHE_RS03735 | CTP synthase                                             | Purines, pyrimidines, nucleosides, and nucleotides   Pyrimidine ribonucleotide biosynthesis |
| <b>Regulatory functions</b>         |                                                          |                                                                                             |
| NSE_RS00025,NRI_RS00015,NHE_RS00035 | sensor histidine kinase PleC                             | Regulatory functions   Protein interactions                                                 |
| NSE_RS02175,NRI_RS02220,NHE_RS02255 | Sensor histidine kinase, PleC-like                       | Regulatory functions   Protein interactions                                                 |
| NSE_RS02085,NRI_RS02130,NHE_RS02155 | response regulator/GGDEF domain protein PleD             | Regulatory functions   Other                                                                |
| NSE_RS01495,NRI_RS01545,NHE_RS01535 | Sensor histidine kinase/response regulator, CckA         | Regulatory functions   Protein interactions                                                 |
| NSE_RS00930,NRI_RS00970,NHE_RS00925 | DNA-binding response regulator CtrA                      | Regulatory functions   DNA interactions                                                     |
| NSE_RS01785,NRI_RS01825,NHE_RS01830 | EAL domain protein                                       | Regulatory functions   Other                                                                |



|                                                             |                                                                           |                                                                      |
|-------------------------------------------------------------|---------------------------------------------------------------------------|----------------------------------------------------------------------|
| NSE_RS03985,NRI_RS02020,NHE_RS04205                         | Transposase and inactivated derivatives                                   | Regulatory functions   Other                                         |
| NSE_RS01195,NRI_RS01240,NHE_RS01200                         | transcriptional regulator, MerR family protein                            | Regulatory functions   DNA interactions                              |
| NSE_RS01460,NRI_RS01510,NHE_RS01495                         | ATP cone domain protein                                                   | Regulatory functions   DNA interactions                              |
| NSE_RS03325,NRI_RS03405,NHE_RS03490                         | NifU-like domain protein                                                  | Regulatory functions   Other                                         |
| <b><u>Transcription</u></b>                                 |                                                                           |                                                                      |
| NSE_RS01295,NRI_RS01345,NHE_RS01300                         | RNA polymerase sigma factor RpoD                                          | Transcription   Transcription factors                                |
| NSE_RS01415,NRI_RS01465,NHE_RS01445                         | RNA polymerase sigma-32 factor RpoH                                       | Transcription   Transcription factors                                |
| NSE_RS00160,NRI_RS00145,NHE_RS00155                         | Neorickettsia expression regulator NhxR                                   | Transcription   Transcription factors                                |
| NSE_RS00920,NRI_RS00960,NHE_RS00915                         | putative transcriptional regulator Tr1                                    | Transcription   Transcription factors                                |
| NSE_RS02065,NRI_RS02110,NHE_RS02120                         | SOS-response transcriptional repressor LexA                               | Unknown function   General                                           |
| NSE_RS02690,NRI_RS02780,NHE_RS02805                         | ribonuclease HI                                                           | Transcription   Degradation of RNA                                   |
| NSE_RS02850,NRI_RS02940,NHE_RS02970                         | ribonuclease HII                                                          | Transcription   Degradation of RNA                                   |
| NSE_RS01185,NRI_RS01230,NHE_RS01190                         | DNA-directed RNA polymerase, alpha subunit                                | Transcription   DNA-dependent RNA polymerase                         |
| NSE_RS02735,NRI_RS02825,NHE_RS02855                         | DNA-directed RNA polymerase, beta subunit                                 | Transcription   DNA-dependent RNA polymerase                         |
| NSE_RS03975,NRI_RS00150,NHE_RS00160                         | DNA-directed RNA polymerase, omega subunit                                | Transcription   DNA-dependent RNA polymerase                         |
| NSE_RS03380,NRI_RS03460,NHE_RS03560                         | metallo-beta-lactamase family, beta-CASP subfamily                        | Transcription   Other                                                |
| NSE_RS00480,NRI_RS00525,NHE_RS00475                         | putative 16S rRNA processing protein RimM                                 | Transcription   RNA processing                                       |
| NSE_RS02135,NRI_RS02180,NHE_RS02210                         | putative ribosome-binding factor A                                        | Transcription   RNA processing                                       |
| NSE_RS02165,NRI_RS02210,NHE_RS02245                         | 3'-5' exonuclease family protein                                          | Transcription   RNA processing                                       |
| NSE_RS03495,NRI_RS03575,NHE_RS04225                         | ribonuclease P protein component                                          | Transcription   RNA processing                                       |
| NSE_RS03745,NRI_RS03830,NHE_RS03915                         | ribonuclease III                                                          | Transcription   RNA processing                                       |
| NSE_RS00305,NRI_RS00295,NHE_RS00310                         | transcription termination factor Rho                                      | Transcription   Transcription factors                                |
| NSE_RS02125,NRI_RS02170,NHE_RS02200                         | N utilization substance protein A                                         | Transcription   Transcription factors                                |
| NSE_RS02450,NRI_RS02505,NHE_RS02555                         | conserved hypothetical protein                                            | Transcription   Transcription factors                                |
| NSE_RS02700,NRI_RS02790,NHE_RS02815                         | transcription elongation factor GreA                                      | Transcription   Transcription factors                                |
| NSE_RS02760,NRI_RS02850,NHE_RS02880                         | putative transcription termination/antitermination factor NusG            | Transcription   Transcription factors                                |
| NSE_RS03585,NRI_RS03665,NHE_RS03750                         | putative N utilization substance protein B                                | Transcription   Transcription factors                                |
| <b><u>Transport and binding proteins</u></b>                |                                                                           |                                                                      |
| NSE_RS01435,NRI_RS01485,NHE_RS01470                         | <b>bacterioferritin</b>                                                   | Transport and binding proteins   Cations and iron carrying compounds |
| NSE_RS00590,NRI_RS00630,NHE_RS00575                         | sodium:alanine symporter family protein                                   | Transport and binding proteins   Amino acids, peptides and amines    |
| NSE_RS02940,NRI_RS03030,NHE_RS03065                         | putative sodium:proline symporter                                         | Transport and binding proteins   Amino acids, peptides and amines    |
| NSE_RS00285,NRI_RS00275,NHE_RS00285                         | putative phosphate ABC transporter, periplasmic phosphate-binding protein | Transport and binding proteins   Anions                              |
| NSE_RS00800,NRI_RS00840,NHE_RS00795,NHE_RS01990,NRI_RS01985 | phosphate ABC transporter, permease protein PstC                          | Transport and binding proteins   Anions                              |
| NSE_RS01940,NRI_RS01985,NHE_RS01990,NRI_RS00840,NHE_RS00795 | phosphate ABC transporter, permease protein PstA                          | Transport and binding proteins   Anions                              |

|                                                 |                                                           |                                                                      |
|-------------------------------------------------|-----------------------------------------------------------|----------------------------------------------------------------------|
| NSE_RS00035,NRI_RS00025,NHE_RS00045             | Fe(3+) ABC transporter substrate-binding protein          | Transport and binding proteins   Cations and iron carrying compounds |
| NSE_RS00135,NRI_RS00120,NHE_RS00130             | Na(+)/H(+) antiporter subunit C                           | Transport and binding proteins   Cations and iron carrying compounds |
| NSE_RS00140,NRI_RS00125,NHE_RS00135             | multisubunit Na+/H+ antiporter, MnhB subunit              | Transport and binding proteins   Cations and iron carrying compounds |
| NSE_RS00145,NRI_RS00130,NHE_RS00140             | multisubunit Na+/H+ antiporter, MnhB subunit              | Transport and binding proteins   Cations and iron carrying compounds |
| NSE_RS00150,NRI_RS00135,NHE_RS00145             | monovalent cation/proton antiporter, MnhG/PhaG subunit    | Transport and binding proteins   Cations and iron carrying compounds |
| NSE_RS01875,NRI_RS01920,NHE_RS01920             | magnesium transporter                                     | Transport and binding proteins   Cations and iron carrying compounds |
| NSE_RS03605,NRI_RS03690,NHE_RS03770             | glutathione-regulated potassium-efflux system protein     | Transport and binding proteins   Cations and iron carrying compounds |
| NSE_RS00535,NRI_RS00580,NHE_RS00530             | putative permease                                         | Transport and binding proteins   Other                               |
| NSE_RS02070,NRI_RS02115,NHE_RS02125             | heme exporter protein, CcmC family                        | Transport and binding proteins   Other                               |
| NSE_RS00585,NRI_RS00625,NHE_RS00570             | efflux transporter, RND family, MFP subunit               | Transport and binding proteins   Unknown substrate                   |
| NSE_RS00605,NRI_RS00645,NHE_RS00590             | putative transporter                                      | Transport and binding proteins   Unknown substrate                   |
| NSE_RS00715,NRI_RS00755,NHE_RS00705             | Multiple resistance and pH regulation protein (MrpF/PhaF) | Transport and binding proteins   Unknown substrate                   |
| NSE_RS00745,NRI_RS00785,NHE_RS00740             | permease, PerM family                                     | Transport and binding proteins   Unknown substrate                   |
| NSE_RS00775,NRI_RS00815,NHE_RS00770             | putative transporter                                      | Transport and binding proteins   Unknown substrate                   |
| NSE_RS00945,NRI_RS00985,NHE_RS00940             | TRAP transporter solute receptor, TAXI family             | Transport and binding proteins   Unknown substrate                   |
| NSE_RS01260,NRI_RS01305,NHE_RS01265             | putative transporter                                      | Transport and binding proteins   Unknown substrate                   |
| NSE_RS01285,NRI_RS01330,NHE_RS01290             | putative ATP-NAD kinase                                   | Transport and binding proteins   Unknown substrate                   |
| NSE_RS01615,NRI_RS01665,NHE_RS01665             | ATP synthase F0, B' chain                                 | Transport and binding proteins   Unknown substrate                   |
| NSE_RS02225,NRI_RS02270,NHE_RS02305             | RDD family protein                                        | Transport and binding proteins   Unknown substrate                   |
| NSE_RS02830,NRI_RS02920,NHE_RS02950             | putative ABC transporter, permease protein                | Transport and binding proteins   Unknown substrate                   |
| NSE_RS02840,NRI_RS02930,NHE_RS02960,NHE_RS02960 | ABC transporter, ATP-binding protein                      | Transport and binding proteins   Unknown substrate                   |
| NSE_RS03170,NRI_RS03255,NHE_RS03325             | major facilitator family transporter                      | Transport and binding proteins   Unknown substrate                   |
| NSE_RS03310,NRI_RS03390,NHE_RS03475             | putative permease                                         | Transport and binding proteins   Unknown substrate                   |
| NSE_RS03425,NRI_RS03505,NHE_RS03590             | TRAP transporter, 4TM/12TM fusion protein                 | Transport and binding proteins   Unknown substrate                   |
| NSE_RS03445,NRI_RS03525,NHE_RS03605             | putative membrane protein                                 | Transport and binding proteins   Unknown substrate                   |
| NSE_RS03450,NRI_RS03530,NHE_RS03610             | mechanosensitive ion channel family protein               | Transport and binding proteins   Unknown substrate                   |
| <b><u>Unknown functions</u></b>                 |                                                           |                                                                      |
| NSE_RS02155,NRI_RS02200,NHE_RS02235             | mce-related protein                                       | Unclassified   Role category not yet assigned                        |
| NSE_RS00195,NRI_RS00180,NHE_RS00190             | hexapeptide transferase family protein                    | Unknown function   Enzymes of unknown specificity                    |
| NSE_RS00735,NRI_RS00775,NHE_RS00730             | conserved hypothetical protein                            | Unknown function   Enzymes of unknown specificity                    |
| NSE_RS00785,NRI_RS00825,NHE_RS00780             | putative methyltransferase                                | Unknown function   Enzymes of unknown specificity                    |
| NSE_RS01320,NRI_RS01370,NHE_RS01330             | aminomethyl transferase family protein                    | Unknown function   Enzymes of unknown specificity                    |
| NSE_RS01470,NRI_RS01520,NHE_RS01510             | hydrolase, TatD family                                    | Unknown function   Enzymes of unknown specificity                    |
| NSE_RS01565,NRI_RS01615,NHE_RS01615             | NADH-ubiquinone oxidoreductase family protein             | Unknown function   Enzymes of unknown specificity                    |

|                                                                                     |                                                                                   |                                                                      |
|-------------------------------------------------------------------------------------|-----------------------------------------------------------------------------------|----------------------------------------------------------------------|
| NSE_RS01905,NRI_RS01950,NHE_RS01955                                                 | putative hydrolase                                                                | Unknown function   Enzymes of unknown specificity                    |
| NSE_RS02095,NRI_RS02140,NHE_RS02165                                                 | NAD-glutamate dehydrogenase family protein                                        | Unknown function   Enzymes of unknown specificity                    |
| NSE_RS02230,NRI_RS02275,NHE_RS02310                                                 | S-adenosylmethionine-dependent methyltransferases                                 | Unknown function   Enzymes of unknown specificity                    |
| NSE_RS02380,NRI_RS02430,NHE_RS02475                                                 | metallo-beta-lactamase family protein                                             | Unknown function   Enzymes of unknown specificity                    |
| NSE_RS02440,NRI_RS02495,NHE_RS02545                                                 | O-methyltransferase family protein                                                | Unknown function   Enzymes of unknown specificity                    |
| NSE_RS02660,NRI_RS02750,NHE_RS02770                                                 | acetyltransferase, GNAT family                                                    | Unknown function   Enzymes of unknown specificity                    |
| NSE_RS02695,NRI_RS02785,NHE_RS02810                                                 | conserved hypothetical protein                                                    | Unknown function   Enzymes of unknown specificity                    |
| NSE_RS03280,NRI_RS03355,NHE_RS03440                                                 | flavin reductase family protein                                                   | Unknown function   Enzymes of unknown specificity                    |
| NSE_RS03355,NRI_RS03435,NHE_RS03530                                                 | Ser/Thr protein phosphatase family protein                                        | Unknown function   Enzymes of unknown specificity                    |
| NSE_RS03545,NRI_RS03625,NHE_RS03710                                                 | hydrolase, alpha/beta fold family                                                 | Unknown function   Enzymes of unknown specificity                    |
| NSE_RS03800,NRI_RS03880,NHE_RS03995                                                 | HAD-superfamily hydrolase, subfamily IA, variant 1                                | Unknown function   Enzymes of unknown specificity                    |
| NSE_RS02935,NRI_RS03025,NHE_RS03060                                                 | Alkyl hydroperoxide reductase subunit AhpC (bacterioferritin comigratory protein) | Transport and binding proteins   Cations and iron carrying compounds |
| NSE_RS00075,NRI_RS00065,NHE_RS00080                                                 | ankyrin repeat protein                                                            | Unknown function   General                                           |
| NSE_RS00485,NRI_RS00530,NHE_RS00480                                                 | RmuC domain protein                                                               | Unknown function   General                                           |
| NSE_RS00500,NRI_RS00545,NHE_RS00495                                                 | modification methylase, HemK family                                               | Unknown function   General                                           |
| NSE_RS00505,NRI_RS00550,NHE_RS00500                                                 | hypothetical protein                                                              | Unknown function   General                                           |
| NSE_RS00790,NRI_RS00830,NHE_RS00785                                                 | BolA family protein                                                               | Unknown function   General                                           |
| NSE_RS00795,NRI_RS00835,NHE_RS00790                                                 | glutaredoxin-related protein                                                      | Unknown function   General                                           |
| NSE_RS00955,NRI_RS00995,NHE_RS00955                                                 | putative membrane protein                                                         | Unknown function   General                                           |
| NSE_RS01020,NRI_RS01060,NHE_RS01020                                                 | rhodanese domain protein                                                          | Unknown function   General                                           |
| NSE_RS01315,NRI_RS01365,NHE_RS01325,NHE_RS04175                                     | ComEC/Rec2 family protein                                                         | Unknown function   General                                           |
| NSE_RS01345,NRI_RS01395,NHE_RS01355                                                 | aromatic rich family protein                                                      | Unknown function   General                                           |
| NSE_RS01360,NRI_RS01410,NHE_RS01370                                                 | CBS/transporter associated domain protein                                         | Unknown function   General                                           |
| NSE_RS01525,NRI_RS01575,NHE_RS01575                                                 | putative tRNA-dihydrouridine synthase                                             | Unknown function   General                                           |
| NSE_RS01600,NRI_RS01650,NHE_RS01650                                                 | YihY family protein                                                               | Unknown function   General                                           |
| NSE_RS01640,NRI_RS01690,NHE_RS01690                                                 | CBS domain protein                                                                | Unknown function   General                                           |
| NSE_RS01680,NRI_RS01730,NHE_RS01730                                                 | HIT domain protein                                                                | Unknown function   General                                           |
| NSE_RS02005,NRI_RS02050,NHE_RS02050,NRI_RS02045,NHE_RS02055                         | ankyrin repeat protein                                                            | Unknown function   General                                           |
| NSE_RS02105,NRI_RS02150,NHE_RS02175                                                 | hypothetical protein                                                              | Unknown function   General                                           |
| NSE_RS02195,NRI_RS02240,NHE_RS02275,NRI_RS03000,NHE_RS03035,NHE_RS03035             | putative GTP-binding protein EngA                                                 | Unknown function   General                                           |
| NSE_RS02375,NRI_RS02425,NHE_RS02470                                                 | Sua5/YciO/YrdC/YwIC family protein                                                | Unknown function   General                                           |
| NSE_RS02425,NRI_RS02480,NHE_RS02530                                                 | fructose-1,6-bisphosphatase, class II                                             | Unknown function   General                                           |
| NSE_RS02910,NRI_RS03000,NHE_RS03035,NHE_RS03035,NRI_RS02240,NHE_RS02275,NHE_RS02275 | tRNA modification GTPase TrmE                                                     | Unknown function   General                                           |
| NSE_RS02945,NRI_RS03035,NHE_RS03070                                                 | pentapeptide repeat domain protein                                                | Unknown function   General                                           |

|                                     |                                             |                                   |
|-------------------------------------|---------------------------------------------|-----------------------------------|
| NSE_RS03095,NRI_RS03180,NHE_RS03245 | conserved hypothetical protein              | Unknown function   General        |
| NSE_RS03145,NRI_RS03230,NHE_RS03300 | hypothetical protein                        | Unknown function   General        |
| NSE_RS03165,NRI_RS03250,NHE_RS03320 | BolA family protein                         | Unknown function   General        |
| NSE_RS03250,NRI_RS03330,NHE_RS03410 | inositol monophosphatase family protein     | Unknown function   General        |
| NSE_RS03420,NRI_RS03500,NHE_RS03585 | CvpA family protein                         | Unknown function   General        |
| NSE_RS03460,NRI_RS03540,NHE_RS03620 | class II aldolase/adducin domain protein    | Unknown function   General        |
| NSE_RS03615,NRI_RS03700,NHE_RS03780 | ATP-binding protein, Mrp/Nbp35 family       | Unknown function   General        |
| NSE_RS03750,NRI_RS03835,NHE_RS03920 | iojap-related protein                       | Unknown function   General        |
| NSE_RS03835,NRI_RS03915,NHE_RS04030 | conserved hypothetical protein              | Unknown function   General        |
| NSE_RS03980,NRI_RS00695,NHE_RS04170 | Smr domain protein                          | Unknown function   General        |
| NSE_RS00020,NRI_RS00010,NHE_RS00030 | hypothetical protein                        | Hypothetical proteins   Conserved |
| NSE_RS00030,NRI_RS00020,NHE_RS00040 | hypothetical protein                        | Hypothetical proteins   Conserved |
| NSE_RS00040,NRI_RS00030,NHE_RS00050 | conserved hypothetical protein              | Hypothetical proteins   Conserved |
| NSE_RS00105,NRI_RS00090,NHE_RS00105 | Ankyrin-repeat protein                      | Hypothetical proteins   Conserved |
| NSE_RS00110,NRI_RS00100,NHE_RS00110 | hypothetical protein                        | Hypothetical proteins   Conserved |
| NSE_RS00115,NRI_RS00105,NHE_RS00115 | hypothetical protein                        | Hypothetical proteins   Conserved |
| NSE_RS00125,NRI_RS00110,NHE_RS00120 | putative membrane protein                   | Hypothetical proteins   Conserved |
| NSE_RS00155,NRI_RS00140,NHE_RS00150 | conserved hypothetical protein              | Hypothetical proteins   Conserved |
| NSE_RS00175,NRI_RS00160,NHE_RS00170 | hypothetical protein                        | Hypothetical proteins   Conserved |
| NSE_RS00230,NRI_RS00215,NHE_RS00225 | conserved hypothetical protein              | Hypothetical proteins   Conserved |
| NSE_RS00490,NRI_RS00535,NHE_RS00485 | conserved hypothetical protein              | Hypothetical proteins   Conserved |
| NSE_RS00710,NRI_RS00750,NHE_RS00700 | hypothetical protein                        | Hypothetical proteins   Conserved |
| NSE_RS00740,NRI_RS00780,NHE_RS00735 | conserved hypothetical protein              | Hypothetical proteins   Conserved |
| NSE_RS00770,NRI_RS00810,NHE_RS00765 | putative lipoprotein                        | Hypothetical proteins   Conserved |
| NSE_RS00805,NRI_RS00845,NHE_RS00800 | hypothetical protein                        | Hypothetical proteins   Conserved |
| NSE_RS00960,NRI_RS01000,NHE_RS00960 | conserved hypothetical protein              | Hypothetical proteins   Conserved |
| NSE_RS00990,NRI_RS01030,NHE_RS00990 | conserved hypothetical protein<br>TIGR00043 | Hypothetical proteins   Conserved |
| NSE_RS01220,NRI_RS01265,NHE_RS01225 | hypothetical protein                        | Hypothetical proteins   Conserved |
| NSE_RS01305,NRI_RS01355,NHE_RS01310 | hypothetical protein                        | Hypothetical proteins   Conserved |
| NSE_RS01350,NRI_RS01400,NHE_RS01360 | conserved hypothetical protein              | Hypothetical proteins   Conserved |
| NSE_RS01365,NRI_RS01415,NHE_RS01418 | hypothetical protein                        | Hypothetical proteins   Conserved |
| NSE_RS01375,NRI_RS01425,NHE_RS01385 | conserved hypothetical protein              | Hypothetical proteins   Conserved |
| NSE_RS01450,NRI_RS01500,NHE_RS01485 | putative membrane protein                   | Hypothetical proteins   Conserved |
| NSE_RS01480,NRI_RS01530,NHE_RS01520 | Tim44-like domain protein                   | Hypothetical proteins   Conserved |

|                                                     |                                             |                                   |
|-----------------------------------------------------|---------------------------------------------|-----------------------------------|
| NSE_RS01490,NRI_RS01540,NHE_RS01530                 | hypothetical protein                        | Hypothetical proteins   Conserved |
| NSE_RS01520,NRI_RS01570,NHE_RS01570                 | hypothetical protein                        | Hypothetical proteins   Conserved |
| NSE_RS01540,NRI_RS01590,NHE_RS01590                 | hypothetical protein                        | Hypothetical proteins   Conserved |
| NSE_RS01575,NRI_RS01625,NHE_RS01625                 | conserved hypothetical protein              | Hypothetical proteins   Conserved |
| NSE_RS01625,NRI_RS01675,NHE_RS01675                 | hypothetical protein                        | Hypothetical proteins   Conserved |
| NSE_RS01735,NRI_RS01775,NHE_RS01775                 | hypothetical protein                        | Hypothetical proteins   Conserved |
| NSE_RS01775,NRI_RS01815,NHE_RS01820                 | hypothetical protein                        | Hypothetical proteins   Conserved |
| NSE_RS01780,NRI_RS01820,NHE_RS01825                 | hypothetical protein                        | Hypothetical proteins   Conserved |
| NSE_RS01815,NRI_RS01855,NHE_RS01860                 | hypothetical protein                        | Hypothetical proteins   Conserved |
| NSE_RS01835,NRI_RS01875,NHE_RS01880                 | conserved hypothetical protein              | Hypothetical proteins   Conserved |
| NSE_RS01840,NRI_RS01880,NHE_RS01885                 | Protein of unknown function (DUF3442)       | Hypothetical proteins   Conserved |
| NSE_RS01860,NRI_RS01905,NHE_RS01905                 | conserved hypothetical protein              | Hypothetical proteins   Conserved |
| NSE_RS01985,NRI_RS02025,NHE_RS02030                 | conserved hypothetical protein<br>TIGR00103 | Hypothetical proteins   Conserved |
| NSE_RS02015,NRI_RS02060,NHE_RS02070                 | hypothetical protein                        | Hypothetical proteins   Conserved |
| NSE_RS02050,NRI_RS02095,NHE_RS02105                 | conserved hypothetical protein              | Hypothetical proteins   Conserved |
| NSE_RS02080,NRI_RS02125,NHE_RS02135,<br>NHE_RS02140 | hypothetical protein                        | Hypothetical proteins   Conserved |
| NSE_RS02115,NRI_RS02160,NHE_RS02185                 | conserved hypothetical protein              | Hypothetical proteins   Conserved |
| NSE_RS02140,NRI_RS02185,NHE_RS02215                 | conserved domain protein                    | Hypothetical proteins   Conserved |
| NSE_RS02150,NRI_RS02195,NHE_RS02230                 | hypothetical protein                        | Hypothetical proteins   Conserved |
| NSE_RS02160,NRI_RS02205,NHE_RS02240                 | hypothetical protein                        | Hypothetical proteins   Conserved |
| NSE_RS02210,NRI_RS02255,NHE_RS02290                 | hypothetical protein                        | Hypothetical proteins   Conserved |
| NSE_RS02315,NRI_RS02365,NHE_RS02405                 | hypothetical protein                        | Hypothetical proteins   Conserved |
| NSE_RS02320,NRI_RS02370,NHE_RS02410                 | hypothetical protein                        | Hypothetical proteins   Conserved |
| NSE_RS02345,NRI_RS02395,NHE_RS02435                 | hypothetical protein                        | Hypothetical proteins   Conserved |
| NSE_RS02385,NRI_RS02435,NHE_RS02480                 | conserved hypothetical protein              | Hypothetical proteins   Conserved |
| NSE_RS02420,NRI_RS02475,NHE_RS02525                 | hypothetical protein                        | Hypothetical proteins   Conserved |
| NSE_RS02435,NRI_RS02490,NHE_RS02540                 | hypothetical protein                        | Hypothetical proteins   Conserved |
| NSE_RS02490,NRI_RS02550,NHE_RS02595                 | hypothetical protein                        | Hypothetical proteins   Conserved |
| NSE_RS02575,NRI_RS02645,NHE_RS02695                 | conserved domain protein                    | Hypothetical proteins   Conserved |
| NSE_RS02590,NRI_RS02660,NHE_RS02710                 | conserved hypothetical protein              | Hypothetical proteins   Conserved |
| NSE_RS02600,NRI_RS02670,NHE_RS02720                 | conserved hypothetical protein<br>TIGR01033 | Hypothetical proteins   Conserved |
| NSE_RS02615,NRI_RS02685,NHE_RS02735                 | hypothetical protein                        | Hypothetical proteins   Conserved |
| NSE_RS02630,NRI_RS02700,NHE_RS02750                 | hypothetical protein                        | Hypothetical proteins   Conserved |
| NSE_RS02665,NRI_RS02755,NHE_RS02775                 | hypothetical protein                        | Hypothetical proteins   Conserved |

|                                                                             |                                             |                                   |
|-----------------------------------------------------------------------------|---------------------------------------------|-----------------------------------|
| NSE_RS02680,NRI_RS02770,NHE_RS02790                                         | OmpH-like outer membrane protein            | Hypothetical proteins   Conserved |
| NSE_RS02710,NRI_RS02800,NHE_RS02830                                         | hypothetical protein                        | Hypothetical proteins   Conserved |
| NSE_RS02845,NRI_RS02935,NHE_RS02965                                         | conserved hypothetical protein<br>TIGR00150 | Hypothetical proteins   Conserved |
| NSE_RS02855,NRI_RS02945,NHE_RS02975                                         | hypothetical protein                        | Hypothetical proteins   Conserved |
| NSE_RS02875,NRI_RS02965,NHE_RS03000                                         | hypothetical protein                        | Hypothetical proteins   Conserved |
| NSE_RS02880,NRI_RS02970,NHE_RS03005                                         | conserved hypothetical protein              | Hypothetical proteins   Conserved |
| NSE_RS02955,NRI_RS04080,NHE_RS03080                                         | hypothetical protein                        | Hypothetical proteins   Conserved |
| NSE_RS02960,NRI_RS03050,NHE_RS03085                                         | hypothetical protein                        | Hypothetical proteins   Conserved |
| NSE_RS02970,NRI_RS03060,NHE_RS03100                                         | hypothetical protein                        | Hypothetical proteins   Conserved |
| NSE_RS03035,NRI_RS03125,NHE_RS03190                                         | hypothetical protein                        | Hypothetical proteins   Conserved |
| NSE_RS03040,NRI_RS03130,NHE_RS03195                                         | hypothetical protein                        | Hypothetical proteins   Conserved |
| NSE_RS03115,NRI_RS03200,NHE_RS03265                                         | hypothetical protein                        | Hypothetical proteins   Conserved |
| NSE_RS03185,NRI_RS03270,NHE_RS03345                                         | hypothetical protein                        | Hypothetical proteins   Conserved |
| NSE_RS03190,NRI_RS03275,NHE_RS03350                                         | hypothetical protein                        | Hypothetical proteins   Conserved |
| NSE_RS03195,NRI_RS03280,NHE_RS03355                                         | hypothetical protein                        | Hypothetical proteins   Conserved |
| NSE_RS03205,NRI_RS03290,NHE_RS03365                                         | hypothetical protein                        | Hypothetical proteins   Conserved |
| NSE_RS03235,NRI_RS03315,NHE_RS03395                                         | hypothetical protein                        | Hypothetical proteins   Conserved |
| NSE_RS03180,NSE_RS03390,NRI_RS03465,<br>NHE_RS03565,NRI_RS03265,NHE_RS03340 | tRNA-i(6)A37 modification enzyme MiaB       | Hypothetical proteins   Conserved |
| NSE_RS03540,NRI_RS03620,NHE_RS03705                                         | hypothetical protein                        | Hypothetical proteins   Conserved |
| NSE_RS03580,NRI_RS03660,NHE_RS03745                                         | hypothetical protein                        | Hypothetical proteins   Conserved |
| NSE_RS03590,NRI_RS03670,NHE_RS03755                                         | maf protein                                 | Hypothetical proteins   Conserved |
| NSE_RS03625,NRI_RS03710,NHE_RS03790                                         | conserved hypothetical protein              | Hypothetical proteins   Conserved |
| NSE_RS03635,NRI_RS03720,NHE_RS03800                                         | conserved hypothetical protein              | Hypothetical proteins   Conserved |
| NSE_RS03675,NRI_RS03760,NHE_RS03840                                         | conserved hypothetical protein              | Hypothetical proteins   Conserved |
| NSE_RS03685,NRI_RS03770,NHE_RS03850                                         | hypothetical protein                        | Hypothetical proteins   Conserved |
| NSE_RS03740,NHE_RS03910,NRI_RS03820,<br>NRI_RS03825                         | hypothetical protein                        | Hypothetical proteins   Conserved |
| NSE_RS03815,NRI_RS03895,NHE_RS04010                                         | conserved hypothetical protein              | Hypothetical proteins   Conserved |
| NSE_RS03820,NRI_RS03900,NHE_RS04015                                         | conserved hypothetical protein              | Hypothetical proteins   Conserved |
| NSE_RS03925,NRI_RS04005,NHE_RS04130                                         | hypothetical protein                        | Hypothetical proteins   Conserved |
| NSE_RS03940,NRI_RS04020,NHE_RS04155                                         | conserved domain protein                    | Hypothetical proteins   Conserved |
| NSE_RS03965,NRI_RS04045,NHE_RS00020                                         | conserved hypothetical protein              | Hypothetical proteins   Conserved |
