# Supplementary material for: Analysis of complete genome sequence and major surface antigens of Neorickettsia helminthoeca, causative agent of salmon poisoning disease
Source: PubMed Central journal article supplement (PMC5481527; doi:10.1111/1751-7915.12731), 2017-06-06
Supplement: MBT2-10-933-s007.pdf [file MBT2-10-933-s007.pdf]

**Supplementary Table 2. *N. helminthoeca*-specific proteins compared to *N. sennetsu* and *N. risticii* <sup>1</sup>**

| Locus_ID    | Protein Name                                                                          | AA#  | Main Role                                       | Sub Role                                                          | Top Hits Species (Class, E-value) <sup>2</sup>                                                     |
|-------------|---------------------------------------------------------------------------------------|------|-------------------------------------------------|-------------------------------------------------------------------|----------------------------------------------------------------------------------------------------|
| NHE_RS00250 | aspartate kinase domain protein                                                       | 397  | Amino acid biosynthesis                         | Aspartate family                                                  | <i>Bacillus muralis</i> (Bacilli, 3e <sup>-55</sup> )                                              |
| NHE_RS02825 | succinyl-diaminopimelate desuccinylase                                                | 371  | Amino acid biosynthesis                         | Aspartate family                                                  | <i>Wolbachia</i> sp. of <i>Drosophila simulans</i> ( $\alpha$ -Proteobacteria, 1e <sup>-94</sup> ) |
| NHE_RS03445 | dihydrodipicolinate reductase, family protein                                         | 151  | Amino acid biosynthesis                         | Aspartate family                                                  | <i>Campylobacter ureolyticus</i> ( $\epsilon$ -Proteobacteria, 2e <sup>-20</sup> )                 |
| NHE_RS03415 | magnesium chelatase, subunit Chll family protein                                      | 1049 | Biosynthesis of cofactors and prosthetic groups | Chlorophyll and bacteriochlorophyll                               |                                                                                                    |
| NHE_RS00710 | UDP-N-acetylglucosamine diphosphorylase (glucosamine-1-phosphate N-acetyltransferase) | 432  | Cell envelope                                   | Biosynthesis and degradation of murein sacculus and peptidoglycan | <i>Paracoccus tibetensis</i> ( $\alpha$ -Proteobacteria, 4e <sup>-122</sup> )                      |
| NHE_RS03095 | phosphoglucosamine mutase                                                             | 439  | Cell envelope                                   | Biosynthesis and degradation of murein sacculus and peptidoglycan | <i>Magnetospirillum marisnigri</i> ( $\alpha$ -Proteobacteria, 2e <sup>-143</sup> )                |
| NHE_RS01455 | penicillin binding transpeptidase domain protein                                      | 528  | Cell envelope                                   | Biosynthesis and degradation of murein sacculus and peptidoglycan | <i>Ca. Neoehrlichia lotoris</i> ( $\alpha$ -Proteobacteria, 2e <sup>-126</sup> )                   |
| NHE_RS03220 | rod shape-determining MreC family protein                                             | 256  | Cell envelope                                   | Biosynthesis and degradation of murein sacculus and peptidoglycan |                                                                                                    |
| NHE_RS02450 | D-alanyl-D-alanine carboxypeptidase family protein                                    | 399  | Cell envelope                                   | Biosynthesis and degradation of murein sacculus and peptidoglycan | <i>Wolbachia</i> sp. of <i>Cimex lectularius</i> ( $\alpha$ -Proteobacteria, e <sup>-114</sup> )   |
| NHE_RS02495 | D-ala D-ala ligase family protein                                                     | 313  | Cell envelope                                   | Biosynthesis and degradation of murein sacculus and peptidoglycan | <i>Wolbachia</i> sp. of <i>Cimex lectularius</i> ( $\alpha$ -Proteobacteria, 5e <sup>-60</sup> )   |
| NHE_RS03375 | UDP-N-acetylmuramate--alanine ligase                                                  | 424  | Cell envelope                                   | Biosynthesis and degradation of murein sacculus and peptidoglycan | <i>Thermodesulfobivrio</i> sp. N1 (Nitrospirales, 2e <sup>-79</sup> )                              |
| NHE_RS04135 | UDP-N-acetylglucosamine 1-carboxyvinyltransferase                                     | 418  | Cell envelope                                   | Biosynthesis and degradation of murein sacculus and peptidoglycan | <i>Ca. Pelagibacter</i> sp. IMCC9063 ( $\alpha$ -Proteobacteria, 3e <sup>-109</sup> )              |
| NHE_RS02795 | phospho-N-acetylmuramoyl-pentapeptide-transferase                                     | 324  | Cell envelope                                   | Biosynthesis and degradation of murein                            | <i>Bacillus bataviensis</i> (Bacilli, 4e <sup>-68</sup> )                                          |

<sup>1</sup> *N. helminthoeca*-specific proteins were identified by comparison with *N. sennetsu* and *N. risticii* protein databases using BLASTP algorithm with E-value < 1e<sup>-10</sup>.

<sup>2</sup> *N. helminthoeca*-specific proteins were blasted against NCBI protein database NR excluding *Neorickettsia* spp. with E-value < 1e<sup>-10</sup>. The species, class, and E-value of the top matches to the *N. helminthoeca* proteins were listed. Blank fields, no matches were identified based on the search criteria.

|             |                                                                                       |     |                                 |                                                                   |                                                                                     |
|-------------|---------------------------------------------------------------------------------------|-----|---------------------------------|-------------------------------------------------------------------|-------------------------------------------------------------------------------------|
|             |                                                                                       |     |                                 | sacculus and peptidoglycan                                        |                                                                                     |
| NHE_RS02980 | D-alanyl-D-alanine carboxypeptidase family protein                                    | 284 | Cell envelope                   | Biosynthesis and degradation of murein sacculus and peptidoglycan | <i>Crenothrix polyspora</i> ( $\gamma$ -Proteobacteria, 8e <sup>68</sup> )          |
| NHE_RS00945 | UDP-N-acetylmuramoylalanine--D-glutamate ligase                                       | 468 | Cell envelope                   | Biosynthesis and degradation of murein sacculus and peptidoglycan | <i>Robiginitomaculum antarcticum</i> ( $\alpha$ -Proteobacteria, 3e <sup>57</sup> ) |
| NHE_RS00380 | undecaprenyldiphospho-muramoylpentapeptide $\beta$ -N-acetyl-glucosaminyl-transferase | 338 | Cell envelope                   | Biosynthesis and degradation of murein sacculus and peptidoglycan | <i>Caedibacter varicaedens</i> ( $\alpha$ -Proteobacteria, 3e <sup>57</sup> )       |
| NHE_RS03115 | penicillin binding transpeptidase domain protein                                      | 566 | Cell envelope                   | Biosynthesis and degradation of murein sacculus and peptidoglycan | <i>Anaplasma marginale</i> ( $\alpha$ -Proteobacteria, 2e <sup>108</sup> )          |
| NHE_RS03175 | diaminopimelate epimerase DapF                                                        | 266 | Cell envelope                   | Biosynthesis and degradation of murein sacculus and peptidoglycan | <i>Prochlorococcus marinus</i> (Synechococcales, 9e <sup>30</sup> )                 |
| NHE_RS03990 | D-alanine aminotransferase                                                            | 310 | Cell envelope                   | Biosynthesis and degradation of murein sacculus and peptidoglycan | <i>Ralstonia solanacearum</i> ( $\beta$ -Proteobacteria, 1e <sup>58</sup> )         |
| NHE_RS01430 | putative membrane protein                                                             | 164 | Cell envelope                   | Other                                                             |                                                                                     |
| NHE_RS04200 | rare lipoA family protein                                                             | 226 | Cell envelope                   | Other                                                             | <i>Wolbachia pipientis</i> ( $\alpha$ -Proteobacteria, 1e <sup>43</sup> )           |
| NHE_RS01810 | cell division protein FtsW                                                            | 369 | Cellular processes              | Cell division                                                     | <i>Caedibacter varicaedens</i> ( $\alpha$ -Proteobacteria, 4e <sup>91</sup> )       |
| NHE_RS02385 | rod shape-determining protein RodA                                                    | 377 | Cellular processes              | Cell division                                                     | Rhodospirillaceae bacterium BRH_c57 ( $\alpha$ -Proteobacteria, 4e <sup>77</sup> )  |
| NHE_RS02100 | hydroxyacylglutathione hydrolase                                                      | 247 | Cellular processes              | Detoxification                                                    | <i>Vibrio halioticoli</i> ( $\gamma$ -Proteobacteria, 2e <sup>67</sup> )            |
| NHE_RS00090 | carbonic anhydrase family protein                                                     | 213 | Central intermediary metabolism | Other                                                             | <i>Desulfovibrio vulgaris</i> ( $\delta$ -Proteobacteria, 1e <sup>62</sup> )        |
| NHE_RS01115 | ribosomal protein L29                                                                 | 63  | Protein synthesis               | Ribosomal proteins: synthesis and modification                    |                                                                                     |
| NHE_RS03975 | ribosomal L36 family protein                                                          | 44  | Protein synthesis               | Ribosomal proteins: synthesis and modification                    |                                                                                     |
| NHE_RS03330 | putative Mg chelatase-like domain protein                                             | 116 | Transport and binding proteins  | Unknown substrate                                                 |                                                                                     |
| NHE_RS03535 | tol-Pal system beta propeller repeat protein TolB                                     | 426 | Transport and binding proteins  | Other                                                             | <i>Thalassospira profundimaris</i> ( $\alpha$ -Proteobacteria, 1e <sup>126</sup> )  |
| NHE_RS02060 | hexapeptide transferase family protein                                                | 611 | Transport and binding proteins  | Unknown substrate                                                 |                                                                                     |

|             |                                                      |     |                                |                                     |                                                                                           |
|-------------|------------------------------------------------------|-----|--------------------------------|-------------------------------------|-------------------------------------------------------------------------------------------|
| NHE_RS03955 | biopolymer transport ExbD/TolR family protein        | 136 | Transport and binding proteins | Cations and iron carrying compounds | <i>Xanthobacter</i> sp. 126 ( $\alpha$ -Proteobacteria, $2e^{-29}$ )                      |
| NHE_RS03960 | motA/TolQ/ExbB proton channel family protein         | 218 | Transport and binding proteins | Cations and iron carrying compounds | <i>Rickettsia prowazekii</i> ( $\alpha$ -Proteobacteria, $1e^{-42}$ )                     |
| NHE_RS02515 | BON domain protein                                   | 535 | Unknown function               | General                             |                                                                                           |
| NHE_RS01320 | quinolinate synthetase A family protein              | 236 | Unknown function               | Enzymes of unknown specificity      |                                                                                           |
| NHE_RS04220 | bacterial SH3 domain protein                         | 148 | Unknown function               | General                             | <i>Wolbachia</i> sp. of <i>Cimex lectularius</i> ( $\alpha$ -Proteobacteria, $5e^{-20}$ ) |
| NHE_RS01565 | bacterial transferase hexapeptide family protein     | 280 | Unknown function               | Enzymes of unknown specificity      | <i>Ehrlichia chaffeensis</i> ( $\alpha$ -Proteobacteria, $7e^{-113}$ )                    |
| NHE_RS02225 | inhibitor of apoptosis-promoting Bax1 family protein | 321 | Unclassified                   |                                     |                                                                                           |
| NHE_RS00600 | ccmB family protein                                  | 203 | Unclassified                   |                                     |                                                                                           |
| NHE_RS00220 | conserved hypothetical protein                       | 841 | Hypothetical proteins          | Conserved                           | <i>Klebsormidium flaccidum</i> (Streptophyta, $8e^{-35}$ )                                |
| NHE_RS00330 | hypothetical protein                                 | 123 | Unknown function               | General                             |                                                                                           |
| NHE_RS01050 | hypothetical protein                                 | 259 | Hypothetical proteins          | General                             |                                                                                           |
| NHE_RS03510 | hypothetical protein                                 | 407 | Hypothetical proteins          | General                             |                                                                                           |
| NHE_RS00300 | hypothetical protein                                 | 67  | Hypothetical proteins          | General                             |                                                                                           |
| NHE_RS00555 | hypothetical protein                                 | 224 | Hypothetical proteins          | General                             |                                                                                           |
| NHE_RS03875 | hypothetical protein                                 | 84  | Hypothetical proteins          | General                             |                                                                                           |
| NHE_RS00420 | hypothetical protein                                 | 257 | Hypothetical proteins          | General                             |                                                                                           |
| NHE_RS02660 | hypothetical protein                                 | 401 | Hypothetical proteins          | General                             |                                                                                           |
| NHE_RS02195 | hypothetical protein                                 | 59  | Hypothetical proteins          | General                             |                                                                                           |
| NHE_RS00350 | hypothetical protein                                 | 208 | Hypothetical proteins          | General                             |                                                                                           |
| NHE_RS01395 | hypothetical protein                                 | 60  | Hypothetical proteins          | General                             |                                                                                           |
| NHE_RS03520 | hypothetical protein                                 | 403 | Hypothetical proteins          | General                             |                                                                                           |
| NHE_RS00320 | hypothetical protein                                 | 272 | Hypothetical proteins          | General                             |                                                                                           |
| NHE_RS03885 | hypothetical protein                                 | 70  | Hypothetical proteins          | General                             |                                                                                           |
| NHE_RS02765 | hypothetical protein                                 | 133 | Hypothetical proteins          | General                             |                                                                                           |
| NHE_RS00425 | hypothetical protein                                 | 286 | Hypothetical proteins          | General                             |                                                                                           |
| NHE_RS00665 | hypothetical protein                                 | 292 | Hypothetical proteins          | General                             |                                                                                           |
| NHE_RS02365 | hypothetical protein                                 | 434 | Hypothetical proteins          | General                             |                                                                                           |

|             |                      |     |                       |         |                                                                          |
|-------------|----------------------|-----|-----------------------|---------|--------------------------------------------------------------------------|
| NHE_RS00355 | hypothetical protein | 118 | Hypothetical proteins | General |                                                                          |
| NHE_RS01500 | hypothetical protein | 287 | Hypothetical proteins | General |                                                                          |
| NHE_RS03525 | hypothetical protein | 601 | Hypothetical proteins | General |                                                                          |
| NHE_RS00325 | hypothetical protein | 201 | Hypothetical proteins | General |                                                                          |
| NHE_RS03925 | hypothetical protein | 99  | Hypothetical proteins | General |                                                                          |
| NHE_RS03130 | hypothetical protein | 60  | Hypothetical proteins | General |                                                                          |
| NHE_RS00430 | hypothetical protein | 91  | Hypothetical proteins | General |                                                                          |
| NHE_RS00725 | hypothetical protein | 138 | Hypothetical proteins | General |                                                                          |
| NHE_RS00360 | hypothetical protein | 98  | Hypothetical proteins | General |                                                                          |
| NHE_RS02570 | hypothetical protein | 711 | Hypothetical proteins | General |                                                                          |
| NHE_RS03950 | hypothetical protein | 285 | Hypothetical proteins | General | Ca. Neoehrlichia lotoris ( $\alpha$ -Proteobacteria, 1e <sup>-31</sup> ) |
| NHE_RS01550 | hypothetical protein | 93  | Hypothetical proteins | General |                                                                          |
| NHE_RS03860 | hypothetical protein | 126 | Hypothetical proteins | General |                                                                          |
| NHE_RS00335 | hypothetical protein | 92  | Hypothetical proteins | General |                                                                          |
| NHE_RS00435 | hypothetical protein | 111 | Hypothetical proteins | General |                                                                          |
| NHE_RS00755 | hypothetical protein | 74  | Hypothetical proteins | General |                                                                          |
| NHE_RS00365 | hypothetical protein | 260 | Hypothetical proteins | General |                                                                          |
| NHE_RS02575 | hypothetical protein | 561 | Hypothetical proteins | General |                                                                          |
| NHE_RS04070 | hypothetical protein | 441 | Hypothetical proteins | General |                                                                          |
| NHE_RS01935 | hypothetical protein | 182 | Hypothetical proteins | General |                                                                          |
| NHE_RS03865 | hypothetical protein | 70  | Hypothetical proteins | General |                                                                          |
| NHE_RS00340 | hypothetical protein | 247 | Hypothetical proteins | General |                                                                          |
| NHE_RS00865 | hypothetical protein | 141 | Hypothetical proteins | General |                                                                          |
| NHE_RS03180 | hypothetical protein | 103 | Hypothetical proteins | General |                                                                          |
| NHE_RS00540 | hypothetical protein | 373 | Hypothetical proteins | General |                                                                          |
| NHE_RS00415 | hypothetical protein | 277 | Hypothetical proteins | General |                                                                          |
| NHE_RS02580 | hypothetical protein | 699 | Hypothetical proteins | General |                                                                          |
| NHE_RS04100 | hypothetical protein | 101 | Hypothetical proteins | General |                                                                          |
| NHE_RS02145 | hypothetical protein | 93  | Hypothetical proteins | General |                                                                          |
| NHE_RS00345 | hypothetical protein | 201 | Hypothetical proteins | General |                                                                          |

|             |                      |     |                  |         |
|-------------|----------------------|-----|------------------|---------|
| NHE_RS00440 | hypothetical protein | 163 | Unknown function | General |
| NHE_RS00445 | hypothetical protein | 152 | Unknown function | General |
