# Supplementary material for: Analysis of complete genome sequence and major surface antigens of Neorickettsia helminthoeca, causative agent of salmon poisoning disease
Source: PubMed Central journal article supplement (PMC5481527; doi:10.1111/1751-7915.12731), 2017-06-06
Supplement: MBT2-10-933-s008.pdf [file MBT2-10-933-s008.pdf]

**Supplementary Table 3. *N. risticii*-specific proteins compared to *N. helminthoeca* and *N. sennetsu* <sup>1</sup>**

| Locus_ID    | Protein Name                   | Protein Length | Main Role             | Sub Role  |
|-------------|--------------------------------|----------------|-----------------------|-----------|
| NRI_RS00085 | hypothetical protein           | 83             | Unknown function      | General   |
| NRI_RS00095 | hypothetical protein           | 76             | Unknown function      | General   |
| NRI_RS00240 | hypothetical protein           | 60             | Unknown function      | General   |
| NRI_RS00315 | hypothetical protein           | 219            | Unknown function      | General   |
| NRI_RS00325 | hypothetical protein           | 62             | Unknown function      | General   |
| NRI_RS00365 | hypothetical protein           | 210            | Unknown function      | General   |
| NRI_RS00370 | hypothetical protein           | 208            | Unknown function      | General   |
| NRI_RS00415 | hypothetical protein           | 74             | Unknown function      | General   |
| NRI_RS00440 | hypothetical protein           | 111            | Unknown function      | General   |
| NRI_RS00460 | hypothetical protein           | 81             | Unknown function      | General   |
| NRI_RS00485 | hypothetical protein           | 82             | Unknown function      | General   |
| NRI_RS00615 | hypothetical protein           | 205            | Unknown function      | General   |
| NRI_RS00770 | hypothetical protein           | 76             | Unknown function      | General   |
| NRI_RS01090 | hypothetical protein           | 91             | Unknown function      | General   |
| NRI_RS01340 | hypothetical protein           | 63             | Unknown function      | General   |
| NRI_RS01900 | hypothetical protein           | 60             | Unknown function      | General   |
| NRI_RS02350 | hypothetical protein           | 104            | Unknown function      | General   |
| NRI_RS02630 | hypothetical protein           | 61             | Unknown function      | General   |
| NRI_RS02740 | hypothetical protein           | 118            | Unknown function      | General   |
| NRI_RS03370 | hypothetical protein           | 65             | Unknown function      | General   |
| NRI_RS03385 | hypothetical protein           | 60             | Unknown function      | General   |
| NRI_RS03470 | hypothetical protein           | 59             | Unknown function      | General   |
| NRI_RS00320 | conserved hypothetical protein | 352            | Hypothetical proteins | Conserved |
| NRI_RS00380 | conserved hypothetical protein | 179            | Hypothetical proteins | Conserved |
| NRI_RS02090 | conserved hypothetical protein | 77             | Hypothetical proteins | Conserved |
| NRI_RS02530 | conserved hypothetical protein | 310            | Hypothetical proteins | Conserved |
| NRI_RS02730 | conserved hypothetical protein | 278            | Hypothetical proteins | Conserved |
| NRI_RS03680 | conserved hypothetical protein | 71             | Hypothetical proteins | Conserved |

<sup>1</sup> *N. risticii*-specific proteins were identified by comparison with *N. helminthoeca* and *N. sennetsu* protein databases using BLASTP algorithm with E-value < 1e<sup>-10</sup>.
