# Supplementary material for: Analysis of complete genome sequence and major surface antigens of Neorickettsia helminthoeca, causative agent of salmon poisoning disease
Source: PubMed Central journal article supplement (PMC5481527; doi:10.1111/1751-7915.12731), 2017-06-06
Supplement: MBT2-10-933-s009.pdf [file MBT2-10-933-s009.pdf]

**Supplementary Table 4. *N. sennetsu*-specific proteins compared to *N. helminthoeca* and *N. risticii* <sup>1</sup>**

| Locus_ID    | Protein Name         | Protein Length | Main Role        | Sub Role |
|-------------|----------------------|----------------|------------------|----------|
| NSE_RS00095 | hypothetical protein | 85             | Unknown function | General  |
| NSE_RS00100 | hypothetical protein | 92             | Unknown function | General  |
| NSE_RS00120 | hypothetical protein | 69             | Unknown function | General  |
| NSE_RS00325 | hypothetical protein | 72             | Unknown function | General  |
| NSE_RS00330 | hypothetical protein | 118            | Unknown function | General  |
| NSE_RS00370 | hypothetical protein | 180            | Unknown function | General  |
| NSE_RS00425 | hypothetical protein | 79             | Unknown function | General  |
| NSE_RS00545 | hypothetical protein | 59             | Unknown function | General  |
| NSE_RS00565 | hypothetical protein | 335            | Unknown function | General  |
| NSE_RS00575 | hypothetical protein | 72             | Unknown function | General  |
| NSE_RS00720 | hypothetical protein | 70             | Unknown function | General  |
| NSE_RS01695 | hypothetical protein | 59             | Unknown function | General  |
| NSE_RS01705 | hypothetical protein | 62             | Unknown function | General  |
| NSE_RS01715 | hypothetical protein | 132            | Unknown function | General  |
| NSE_RS01960 | hypothetical protein | 59             | Unknown function | General  |
| NSE_RS02045 | hypothetical protein | 83             | Unknown function | General  |
| NSE_RS03065 | hypothetical protein | 64             | Unknown function | General  |
| NSE_RS03225 | hypothetical protein | 62             | Unknown function | General  |
| NSE_RS03270 | hypothetical protein | 69             | Unknown function | General  |
| NSE_RS03305 | hypothetical protein | 77             | Unknown function | General  |
| NSE_RS03385 | hypothetical protein | 68             | Unknown function | General  |
| NSE_RS03710 | hypothetical protein | 61             | Unknown function | General  |
| NSE_RS03795 | hypothetical protein | 100            | Unknown function | General  |

<sup>1</sup> *N. sennetsu*-specific proteins were identified by comparison with *N. helminthoeca* and *N. risticii* protein databases using BLASTP algorithm with E-value < 1e<sup>-10</sup>.
