# Supplementary material for: Analysis of complete genome sequence and major surface antigens of Neorickettsia helminthoeca, causative agent of salmon poisoning disease
Source: PubMed Central journal article supplement (PMC5481527; doi:10.1111/1751-7915.12731), 2017-06-06
Supplement: MBT2-10-933-s010.pdf [file MBT2-10-933-s010.pdf]

**Supplementary Table 5. Amino acid and cofactor biosynthesis in Family Anaplasmataceae**

| Organisms <sup>1</sup>            | NHO            | NRI | NES | APH            | ECH |
|-----------------------------------|----------------|-----|-----|----------------|-----|
| <b>Amino Acids: <sup>2</sup></b>  |                |     |     |                |     |
| <b>Alanine</b>                    | +              | +   | +   | +              | +   |
| Arginine                          | -              | -   | -   | + <sup>3</sup> | +   |
| Asparagine                        | -              | -   | -   | +              | +   |
| <b>Aspartate</b>                  | +              | +   | +   | +              | +   |
| Cysteine                          | -              | -   | -   | -              | -   |
| <b>Glycine</b>                    | +              | +   | +   | +              | +   |
| <b>Glutamate</b> <sup>4</sup>     | +              | +   | +   | +              | +   |
| <b>Glutamine</b>                  | +              | +   | +   | +              | +   |
| Histidine                         | -              | -   | -   | -              | -   |
| Leucine                           | -              | -   | -   | -              | -   |
| Lysine                            | - <sup>5</sup> | -   | -   | -              | +   |
| Isoleucine                        | -              | -   | -   | -              | -   |
| Methionine                        | -              | -   | -   | -              | -   |
| Phenylalanine                     | -              | -   | -   | -              | -   |
| Proline                           | -              | -   | -   | -              | -   |
| Serine                            | -              | -   | -   | -              | -   |
| Threonine                         | -              | -   | -   | -              | -   |
| Tryptophan                        | -              | -   | -   | -              | -   |
| Tyrosine                          | -              | -   | -   | -              | -   |
| Valine                            | -              | -   | -   | -              | -   |
| <b>Cofactors:</b>                 |                |     |     |                |     |
| Biotin                            | +              | +   | +   | +              | +   |
| FAD                               | +              | +   | +   | +              | +   |
| Folate                            | +              | +   | +   | +              | +   |
| Lipoate                           | +              | +   | +   | +              | +   |
| NAD                               | +              | +   | +   | +              | +   |
| CoA <sup>6</sup>                  | +              | +   | +   | +              | +   |
| Protoheme                         | +              | +   | +   | +              | +   |
| Pyridoxine phosphate (Vitamin B6) | +              | +   | +   | +              | +   |
| Thiamine                          | +              | +   | +   | +              | +   |
| Ubiquinone                        | +              | +   | +   | +              | +   |

<sup>1</sup> Abbreviations: ECH, *Ehrlichia chaffeensis* Arkansas; APH, *Anaplasma phagocytophilum* HZ; NSE, *N. sennetsu* Miyayama; NRI, *N. risticii* Illinois; NHO, *N. helminthoeca* Oregon.

<sup>2</sup> *N. helminthoeca* encodes genes for 5 amino acids biosynthesis, which are converted from other AAs or metabolic intermediates.

<sup>3</sup> Only partial enzymes are identified in Arginine biosynthesis pathway in APH.

<sup>4</sup> *Ech* and *APH* can convert Pro to Glu through PutA (bifunctional proline dehydrogenase/pyrroline-5-carboxylate dehydrogenase). All Anaplasmataceae can convert Gln to Glu by CarA/B (carbamoyl phosphate synthase) or GS/PH (bifunctional glutamate synthase subunit beta/2-polyprenylphenol hydroxylase).

<sup>5</sup> *N. helminthoeca* encodes complete pathways to synthesize meso-2,6-diaminopimelate (*mDAP*) from L-Asp, but lacks diaminopimelate decarboxylase (LysA) at the last step to produce lysine.

<sup>6</sup> ECH and APH can synthesize CoA from pantothenate, however, all *Neorickettsia* spp. can only convert 4'-phosphopantetheine to CoA.
