# Supplementary material for: Analysis of complete genome sequence and major surface antigens of Neorickettsia helminthoeca, causative agent of salmon poisoning disease
Source: PubMed Central journal article supplement (PMC5481527; doi:10.1111/1751-7915.12731), 2017-06-06
Supplement: MBT2-10-933-s011.pdf [file MBT2-10-933-s011.pdf]

**Supplementary Table 6. Potential pathogenic genes in *Neorickettsia* species**

| Organisms <sup>1</sup>                             | NHO   | NRI   | NSE   |
|----------------------------------------------------|-------|-------|-------|
| <b>Type I Secretion System (T1SS):</b>             |       |       |       |
| ATP-binding cassette (ABC) transporter HlyB        | +     | +     | +     |
| Membrane fusion protein (MFP) HlyD                 | +     | +     | +     |
| Outer membrane channel protein TolC                | +     | +     | +     |
| <b>TAT Pathway:</b>                                |       |       |       |
| twin-arginine translocation protein, TatA/E family | +     | +     | +     |
| twin-arginine translocation protein, TatB          | +     | +     | +     |
| Sec-independent protein translocase TatC           | +     | +     | +     |
| <b>Type IV Secretion System (T4SS):</b>            |       |       |       |
| VirB1                                              | -     | -     | -     |
| VirB2                                              | + (3) | + (2) | + (2) |
| VirB3                                              | +     | +     | +     |
| VirB4                                              | + (2) | + (2) | + (2) |
| VirB5                                              | -     | -     | -     |
| VirB6                                              | + (4) | + (4) | + (4) |
| VirB7                                              | +     | +     | +     |
| VirB8                                              | + (2) | + (2) | + (2) |
| VirB9                                              | + (2) | + (2) | + (2) |
| VirB10                                             | +     | +     | +     |
| VirB11                                             | +     | +     | +     |
| VirD4                                              | +     | +     | +     |
| <b>Two-component Systems:</b>                      |       |       |       |
| PleC/PleD <sup>2</sup>                             | +     | +     | +     |
| CckA/CtrA                                          | +     | +     | +     |
| NtrY/NtrX                                          | -     | -     | -     |
| <b>Putative Secreted Effectors:</b>                |       |       |       |
| Ankyrin-repeat domain proteins                     | 4     | 4     | 3     |

<sup>1</sup> Numbers inside parentheses indicate the copy numbers of the genes; otherwise, only a single copy is present. Abbreviations: NHO, *N. helminthoeca* Oregon; NRI, *N. risticii* Illinois; NSE, *N. sennetsu* Miyayama.

<sup>2</sup> All *Neorickettsia* spp. encodes two copies of sensor histidine kinase PleC.
