# Supplementary material for: Analysis of complete genome sequence and major surface antigens of Neorickettsia helminthoeca, causative agent of salmon poisoning disease
Source: PubMed Central journal article supplement (PMC5481527; doi:10.1111/1751-7915.12731), 2017-06-06
Supplement: MBT2-10-933-s012.pdf [file MBT2-10-933-s012.pdf]

**Supplementary Table 7. Putative Transporters of *N. helminthoeca***

| Locus ID    | Protein Name                                            | Gene | Gene Family | Transporter Family / Subfamily                                                   | Substrate/Function            |
|-------------|---------------------------------------------------------|------|-------------|----------------------------------------------------------------------------------|-------------------------------|
| NHE_RS00575 | sodium:alanine symporter family protein                 |      | AGCS        | The Alanine or Glycine:Cation Symporter (AGCS) Family                            | sodium ion:alanine symporter  |
| NHE_RS00175 | ABC-type protease/lipase transport system               |      | ABC         | The ATP-binding Cassette (ABC) Superfamily / ABC+ membrane                       | protease secretion            |
| NHE_RS01715 | ABC-type multidrug transport system MdlB                |      | ABC         | The ATP-binding Cassette (ABC) Superfamily / ABC+ membrane                       | multidrug                     |
| NHE_RS02960 | heme ABC exporter ATP-binding protein CcmA              | CcmA | ABC         | The ATP-binding Cassette (ABC) Superfamily / binding                             | heme                          |
| NHE_RS00600 | ccmB family protein                                     | CcmB | ABC         | The ATP-binding Cassette (ABC) Superfamily / membrane                            | heme export                   |
| NHE_RS02125 | heme exporter protein, CcmC family                      | CcmC | ABC         | The ATP-binding Cassette (ABC) Superfamily / membrane                            | heme export                   |
| NHE_RS00045 | iron-binding protein FbpA                               | FbpA | ABC         | The ATP-binding Cassette (ABC) Superfamily / Binding                             | iron(III)                     |
| NHE_RS01265 | putative transporter                                    | FbpB | ABC         | The ATP-binding Cassette (ABC) Superfamily / membrane                            | iron(III)                     |
| NHE_RS01995 | ABC-type Fe3+/spermidine/putrescine transport systems   | FbpC | ABC         | The ATP-binding Cassette (ABC) Superfamily / binding                             | Polyamine or iron(III)        |
| NHE_RS01315 | ABC-type lipoprotein export system                      |      | ABC         | The ATP-binding Cassette (ABC) Superfamily / binding                             | lipoprotein                   |
| NHE_RS01370 | CBS domain protein, putative                            |      | ABC         | The ATP-binding Cassette (ABC) Superfamily / binding                             | glycine betaine               |
| NHE_RS02220 | inosine-5'-monophosphate dehydrogenase                  |      | ABC         | The ATP-binding Cassette (ABC) Superfamily / binding                             | glycine betaine               |
| NHE_RS02955 | ABC transporter ATP-binding protein                     |      | ABC         | The ATP-binding Cassette (ABC) Superfamily / binding                             | phosphate                     |
| NHE_RS01990 | phosphate ABC transporter, permease protein PstA        | PstA | ABC         | The ATP-binding Cassette (ABC) Superfamily / membrane                            | phosphate                     |
| NHE_RS03450 | phosphate ABC transporter ATP-binding protein           | PstB | ABC         | The ATP-binding Cassette (ABC) Superfamily / binding                             | phosphate                     |
| NHE_RS00795 | phosphate ABC transporter, permease protein PstC        | PstC | ABC         | The ATP-binding Cassette (ABC) Superfamily / membrane                            | phosphate                     |
| NHE_RS03695 | ABC transporter (iron-sulfur clusters)                  |      | ABC         | The ATP-binding Cassette (ABC) Superfamily / binding                             | lipid A                       |
| NHE_RS04010 | conserved hypothetical protein                          |      | ABC         | The ATP-binding Cassette (ABC) Superfamily / binding                             | toluene tolerance             |
| NHE_RS02235 | mce-related protein                                     |      | ABC         | The ATP-binding Cassette (ABC) Superfamily / binding protein                     | toluene tolerance             |
| NHE_RS04005 | putative VacJ lipoprotein                               |      | ABC         | The ATP-binding Cassette (ABC) Superfamily / binding protein                     | ?                             |
| NHE_RS00530 | lipoprotein releasing system transmembrane protein LolE |      | ABC         | The ATP-binding Cassette (ABC) Superfamily / membrane                            | lipoprotein releasing         |
| NHE_RS02950 | ABC transporter permease protein                        |      | ABC         | The ATP-binding Cassette (ABC) Superfamily / membrane                            | toluene tolerance             |
| NHE_RS00740 | permease, PerM family                                   |      | AI-2E       | The Autoinducer-2 Exporter (AI-2E) Family (Formerly the PerM Family, TC #9.B.22) | Autoinducer-2 export          |
| NHE_RS00660 | auxin Efflux Carrier                                    |      | AEC         | The Auxin Efflux Carrier (AEC) Family                                            |                               |
| NHE_RS01325 | ComEC/Rec2 family protein                               |      | DNA-T       | The Bacterial Competence-related DNA Transformation Transporter (DNA-T) Family   |                               |
| NHE_RS00335 | hypothetical protein                                    |      | CaCA        | The Ca2+:Cation Antiporter (CaCA) Family                                         | proton:calcium ion antiporter |

|             |                                              |      |          |                                                                                                            |                                                 |
|-------------|----------------------------------------------|------|----------|------------------------------------------------------------------------------------------------------------|-------------------------------------------------|
| NHE_RS00345 | hypothetical protein                         |      | CDF      | The Cation Diffusion Facilitator (CDF) Family                                                              | cation efflux                                   |
| NHE_RS01685 | inner membrane protein, 60 kDa               |      | Oxa1     | The Cytochrome Oxidase Biogenesis (Oxa1) Family                                                            | 60 KD inner membrane protein OxaA homolog       |
| NHE_RS00770 | putative transporter                         |      | DAACS    | The Dicarboxylate/Amino Acid:Cation (Na+ or H+) Symporter (DAACS) Family                                   | proton/sodium ion:glutamate/aspartate symporter |
| NHE_RS00590 | putative transporter                         |      | DASS     | The Divalent Anion:Na+ Symporter (DASS) Family                                                             | sodium ion:dicarboxylate/sulfate                |
| NHE_RS00295 | integral membrane protein DUF6               |      | DMT      | The Drug/Metabolite Transporter (DMT) Superfamily                                                          | drug/metabolite?                                |
| NHE_RS03960 | motA/TolQ/ExbB proton channel family protein |      | Mot/Exb  | The H+- or Na+-translocating Bacterial Flagellar Motor 1ExbBD Outer Membrane Transport Energizer (Mot/Exb) |                                                 |
| NHE_RS00505 | ATP synthase F1, alpha subunit               |      | F-ATPase | The H+- or Na+-translocating F-type, V-type and A-type ATPase (F-ATPase) Superfamily                       | protons                                         |
| NHE_RS00510 | ATP synthase F1, delta subunit               |      | F-ATPase | The H+- or Na+-translocating F-type, V-type and A-type ATPase (F-ATPase) Superfamily                       | protons                                         |
| NHE_RS01655 | ATP synthase F0, A subunit                   |      | F-ATPase | The H+- or Na+-translocating F-type, V-type and A-type ATPase (F-ATPase) Superfamily                       | protons                                         |
| NHE_RS01660 | conserved domain protein                     |      | F-ATPase | The H+- or Na+-translocating F-type, V-type and A-type ATPase (F-ATPase) Superfamily                       | protons                                         |
| NHE_RS01665 | ATP synthase F0, B' chain                    |      | F-ATPase | The H+- or Na+-translocating F-type, V-type and A-type ATPase (F-ATPase) Superfamily                       | protons                                         |
| NHE_RS01670 | putative ATPase F0, B chain                  |      | F-ATPase | The H+- or Na+-translocating F-type, V-type and A-type ATPase (F-ATPase) Superfamily                       | protons                                         |
| NHE_RS02510 | ATP synthase F1, gamma subunit               |      | F-ATPase | The H+- or Na+-translocating F-type, V-type and A-type ATPase (F-ATPase) Superfamily                       | protons                                         |
| NHE_RS03260 | ATP synthase F1, alpha subunit               |      | F-ATPase | The H+- or Na+-translocating F-type, V-type and A-type ATPase (F-ATPase) Superfamily                       | protons                                         |
| NHE_RS01690 | CBS domain protein, putative                 |      | HCC      | The HlyC/CorC (HCC) Family                                                                                 | heavy metal ion                                 |
| NHE_RS00290 | drug resistance transporter, Bcr/CflA family |      | MFS      | The Major Facilitator Superfamily (MFS)                                                                    | multidrug efflux                                |
| NHE_RS03325 | major facilitator family transporter         |      | MFS      | The Major Facilitator Superfamily (MFS)                                                                    | multidrug efflux                                |
| NHE_RS03475 | putative permease                            |      | MFS      | The Major Facilitator Superfamily (MFS)                                                                    | Acetyl-CoA:CoA antiporter                       |
| NHE_RS03605 | major facilitator family transporter         |      | MFS      | The Major Facilitator Superfamily (MFS)                                                                    | glycerol-3-phosphate                            |
| NHE_RS01920 | magnesium transporter                        |      | MgtE     | The Mg2+ Transporter-E (MgtE) Family                                                                       | magnesium ion                                   |
| NHE_RS03965 | membrane protein, putative                   |      | MC       | The Mitochondrial Carrier (MC) Family                                                                      |                                                 |
| NHE_RS03970 | membrane protein, putative                   |      | MC       | The Mitochondrial Carrier (MC) Family                                                                      |                                                 |
| NHE_RS00075 | NADH-quinone oxidoreductase chain I          | MnhA | CPA3     | The Monovalent Cation (K+ or Na+):Proton Antiporter-3 (CPA3) Family                                        | multicomponent sodium ion:proton antiporter     |
| NHE_RS02400 | NADH-quinone oxidoreductase chain I          | MnhA | CPA3     | The Monovalent Cation (K+ or Na+):Proton Antiporter-3 (CPA3) Family                                        | multicomponent sodium ion:proton antiporter     |

|             |                                                               |         |        |                                                                                      |                                                |
|-------------|---------------------------------------------------------------|---------|--------|--------------------------------------------------------------------------------------|------------------------------------------------|
| NHE_RS00135 | Domain of unknown function (DUF4040)                          | MnhB    | CPA3   | The Monovalent Cation (K+ or Na+):Proton Antiporter-3 (CPA3) Family                  | multicomponent sodium ion:proton antiporter    |
| NHE_RS00140 | multisubunit Na+/H+ antiporter, MnhB subunit                  | MnhB    | CPA3   | The Monovalent Cation (K+ or Na+):Proton Antiporter-3 (CPA3) Family                  | multicomponent sodium ion:proton antiporter    |
| NHE_RS00130 | monovalent cation/proton antiporter, MnhC/PhaC subunit family | MnhC    | CPA3   | The Monovalent Cation (K+ or Na+):Proton Antiporter-3 (CPA3) Family                  | multicomponent sodium ion:proton antiporter    |
| NHE_RS02990 | NADH-quinone oxidoreductase chain I                           | MnhD    | CPA3   | The Monovalent Cation (K+ or Na+):Proton Antiporter-3 (CPA3) Family                  | multicomponent sodium ion:proton antiporter    |
| NHE_RS02185 | conserved hypothetical protein                                | MnhE    | CPA3   | The Monovalent Cation (K+ or Na+):Proton Antiporter-3 (CPA3) Family                  | multicomponent sodium ion:proton antiporter    |
| NHE_RS00145 | monovalent cation/proton antiporter, MnhG/PhaG subunit        | MnhG    | CPA3   | The Monovalent Cation (K+ or Na+):Proton Antiporter-3 (CPA3) Family                  | multicomponent sodium ion:proton antiporter    |
| NHE_RS00705 | multiple resistance and pH regulation protein F (MrpF / PhaF) |         | CPA3   | The Monovalent Cation (K+ or Na+):Proton Antiporter-3 (CPA3) Family                  | sodium ion:proton antiporter                   |
| NHE_RS03770 | glutathione-regulated potassium-efflux system protein         |         | CPA2   | The Monovalent Cation:Proton Antiporter-2 (CPA2) Family                              | potassium/sodium ion:proton antiporter         |
| NHE_RS02395 | membrane protein, MviN family                                 | MviN    | MOP    | The Multidrug/Oligosaccharidyl-lipid/Polysaccharide (MOP) Flippase Superfamily / MVF | virulence factor MviN                          |
| NHE_RS03705 | conserved hypothetical protein                                |         | OAT    | The Organo Anion Transporter (OAT) Family                                            | organic anion                                  |
| NHE_RS00745 | transporter, AcrB/AcrD/AcrF family                            | HAE1    | RND    | The Resistance-Nodulation-Cell Division (RND) Superfamily                            | multidrug/solvent efflux (HAE1 subfamily)      |
| NHE_RS03610 | mechanosensitive ion channel family protein                   |         | MscS   | The Small Conductance Mechanosensitive Ion Channel (MscS) Family                     | small-conductance mechanosensitive ion channel |
| NHE_RS03065 | putative sodium:proline symporter                             |         | SSS    | The Solute:Sodium Symporter (SSS) Family                                             | sodium ion:proline symporter                   |
| NHE_RS03385 | membrane protein, TerC family                                 |         | TerC   | The Tellurium Ion Resistance (TerC) Family                                           | tellurium ion efflux                           |
| NHE_RS03590 | trap transporter, 4tm/12tm fusion protein                     |         | TRAP-T | The Tripartite ATP-independent Periplasmic Transporter (TRAP-T) Family               | C4-dicarboxylate                               |
| NHE_RS02000 | Twin-arginine translocation protein, TatA/E family            | TatA    | Tat    | The Twin Arginine Targeting (Tat) Family                                             | protein export                                 |
| NHE_RS00490 | twin arginine-targeting protein translocase TatC              | TatC    | Tat    | The Twin Arginine Targeting (Tat) Family                                             | protein export                                 |
| NHE_RS03165 | type IV secretion system protein VirB8 (VirB8-1)              | VirB8-1 | IVSP   | The Type IV (Conjugal DNA-Protein Transfer or VirB) Secretory Pathway (IVSP) Family  |                                                |
| NHE_RS03145 | type IV secretion system protein VirD4                        | VirD4   | IVSP   | The Type IV (Conjugal DNA-Protein Transfer or VirB) Secretory Pathway (IVSP) Family  |                                                |
| NHE_RS03335 | signal peptidase I                                            | LepB    | IVSP   | Protein and peptide secretion and trafficking family                                 |                                                |
| NHE_RS03675 | type IV secretion system protein, VirB6 family (VirB6-2)      | VirB6-2 | YggT   | The YggT or Fanciful K+ Uptake-B (FkuB; YggT) Family                                 | potassium ion uptake?                          |
| NHE_RS03670 | type IV secretion system protein, VirB6 family (VirB6-3)      | VirB6-3 | YggT   | The YggT or Fanciful K+ Uptake-B (FkuB; YggT) Family                                 | potassium ion uptake?                          |
| NHE_RS03665 | type IV secretion system protein, VirB6 family (VirB6-4)      | VirB6-4 | YggT   | The YggT or Fanciful K+ Uptake-B (FkuB; YggT) Family                                 | potassium ion uptake?                          |
