# Supplementary material for: Analysis of complete genome sequence and major surface antigens of Neorickettsia helminthoeca, causative agent of salmon poisoning disease
Source: PubMed Central journal article supplement (PMC5481527; doi:10.1111/1751-7915.12731), 2017-06-06
Supplement: MBT2-10-933-s013.pdf [file MBT2-10-933-s013.pdf]

**Supplementary Table 8. Genes involved in DNA repair and homologous recombination <sup>1</sup>**

|                                                | <b>ECH</b> | <b>APH</b> | <b>NSE</b>                     | <b>NRI</b>  | <b>NHO</b>  |
|------------------------------------------------|------------|------------|--------------------------------|-------------|-------------|
| <b>Direct Repair</b>                           |            |            |                                |             |             |
| Photolyase                                     |            |            | NSE_RS03995 /<br>NSE_RS04000 * | NRI_RS03480 |             |
| DNA ligase ligA                                | ECH0301    | APH0138    | NSE_RS02025                    | NRI_RS02070 | NHE_RS02080 |
| <b>AP Endonuclease</b>                         |            |            |                                |             |             |
| Xth                                            | ECH0675    | APH0505    | NSE_RS01685                    | NRI_RS01735 | NHE_RS01735 |
| <b>Base Excision Repair Glycosylases (BER)</b> |            |            |                                |             |             |
| 3mg                                            | ECH0277    |            |                                |             |             |
| Ung Family 4                                   | ECH0074    | APH1371    | NSE_RS03805                    | NRI_RS03885 | NHE_RS04000 |
| Fpg                                            | ECH0602    | APH0411    |                                |             |             |
| Nth                                            | ECH0857    | APH0897    | NSE_RS00975                    | NRI_RS01015 | NHE_RS00975 |
| <b>Nucleotide Excision Repair (NER)</b>        |            |            |                                |             |             |
| UvrA                                           | ECH0785    | APH0537    |                                |             |             |
| UvrB                                           |            | APH1367    |                                |             |             |
| UvrC                                           |            | APH0884    |                                |             |             |
| UvrD                                           | ECH0860    | APH0903    | NSE_RS01465                    |             | NHE_RS01505 |
| UvrD family                                    | ECH0387    | APH0258    | NSE_RS01885                    | NRI_RS01930 | NHE_RS01930 |
| <b>Transcription Coupling Repair (TCR)</b>     |            |            |                                |             |             |
| Mfd                                            | ECH0250    | APH0107    |                                |             |             |
| <b>Mismatch Repair (MMR)</b>                   |            |            |                                |             |             |
| MutL                                           | ECH0884    | APH0939    | NSE_RS02475                    | NRI_RS02535 |             |
| MutS                                           | ECH0824    | APH0857    | NSE_RS01390                    | NRI_RS01440 | NHE_RS04185 |
| <b>Homologous Recombination</b>                |            |            |                                |             |             |
| <u>RecF Pathway</u>                            |            |            |                                |             |             |
| RecF                                           | ECH0076    | APH1409    | NSE_RS00780                    | NRI_RS00820 | NHE_RS00775 |
| RecJ                                           | ECH1115    | APH1165    | NSE_RS02895                    | NRI_RS02985 | NHE_RS03020 |
| RecO                                           | ECH0536    | APH0736    | NSE_RS01855                    | NRI_RS01895 | NHE_RS01900 |
| RecR                                           | ECH0843    | APH0988    | NSE_RS03670                    | NRI_RS03755 | NHE_RS03835 |

<sup>1</sup> Abbreviations: ECH, *Ehrlichia chaffeensis* Arkansas; APH, *Anaplasma phagocytophilum* HZ; NSE, *N. sennetsu* Miyayama; NRI, *N. risticii* Illinois; NHO, *N. helminthoeca* Oregon.

\* Proteins are truncations due to an internal mutation.

---

|                                     |         |         |             |                              |              |
|-------------------------------------|---------|---------|-------------|------------------------------|--------------|
| <u>Recombinase</u>                  |         |         |             |                              |              |
| RecA                                | ECH1109 | APH1354 | NSE_RS02170 | NRI_RS02215                  | NHE_RS02250  |
| <u>Holliday junction resolution</u> |         |         |             |                              |              |
| RuvA                                | ECH0320 | APH0167 | NSE_RS02360 | NRI_RS02410                  | NHE_RS02455  |
| RuvB                                | ECH0319 | APH0166 | NSE_RS02365 | NRI_RS02415                  | NHE_RS02460  |
| RuvC                                | ECH0028 | APH0018 | NSE_RS03885 | NRI_RS03965                  | NHE_RS04085  |
| RecG                                | ECH0062 | APH1298 | NSE_RS02795 | NRI_RS02885                  | NHE_RS02915  |
| <u>Other recombination</u>          |         |         |             |                              |              |
| RadA                                | ECH0305 |         |             |                              |              |
| <b>Other</b>                        |         |         |             |                              |              |
| RadC                                | ECH0363 | APH0242 | NSE_RS00915 | NRI_RS04065/<br>NRI_RS04060* | NHE_RS00910* |
| XseL                                | ECH0056 | APH1322 |             |                              |              |
| XseS                                | ECH0214 | APH0079 |             |                              |              |
| Hu                                  |         | APH0784 | NSE_RS02595 | NRI_RS02665                  | NHE_RS02715  |
| RmuC                                | ECH0577 | APH0428 | NSE_RS00485 | NRI_RS00530                  | NHE_RS00480  |

---
