# Supplementary material for: Analysis of complete genome sequence and major surface antigens of Neorickettsia helminthoeca, causative agent of salmon poisoning disease
Source: PubMed Central journal article supplement (PMC5481527; doi:10.1111/1751-7915.12731), 2017-06-06
Supplement: MBT2-10-933-s014.pdf [file MBT2-10-933-s014.pdf]

**Supplementary Table 9. Proteins with tandem repeats in *N. helminthoeca* <sup>1</sup>**

| Locus ID           | Protein Name                                                                                                                  | Location of Repeats | Repeat Length | Number of Repeats |
|--------------------|-------------------------------------------------------------------------------------------------------------------------------|---------------------|---------------|-------------------|
| <b>NHE_RS00170</b> | conserved hypothetical protein<br>Repeats: AGPRGEDARANVGDPNLPRSSSLPNPNVSHGQE                                                  | 284 - 346           | 30            | 2                 |
| <b>NHE_RS00220</b> | hypothetical protein<br>Repeats: TRSHGDLTEMRKALSREPS                                                                          | 449 - 788           | 20            | 17                |
| <b>NHE_RS00965</b> | 51 kDa antigen ( <b>P51</b> )<br>Repeats: CGCKKT                                                                              | 39 - 56             | 6             | 3                 |
| <b>NHE_RS04180</b> | conserved hypothetical protein<br>Repeats: VEVQTDAPPEPERSTGAASTQTMSE                                                          | 219 - 468           | 25            | 10                |
| <b>NHE_RS01860</b> | conserved hypothetical protein<br>Repeats 1: PIPSAEVAQQPAAEPVQQATE<br>Repeats 2: VEQGSDDNTGADNIEEAIEPIPPAEVAQQPAAEPVQQATEPIPS | 147 – 209           | 21            | 3                 |
|                    |                                                                                                                               | 18 – 107            | 46            | 2                 |
| <b>NHE_RS02060</b> | hexapeptide transferase family protein<br>Repeats: GEISTGPEAITEATEVQDEVKLNPEVITEASGIVD                                        | 109 - 284           | 35            | 5                 |
| <b>NHE_RS02225</b> | inhibitor of apoptosis-promoting Bax1 family protein<br>Repeats: DRVSDAMPGIQKGAKSTVWTADAAGRVGAVML                             | 94 – 159            | 33            | 2                 |
| <b>NHE_RS02305</b> | RDD family protein<br>Repeats: FPHKVFS                                                                                        | 18 – 31             | 7             | 2                 |
| <b>NHE_RS02365</b> | hypothetical protein<br>Repeats: EIMNTTNK                                                                                     | 201 – 224           | 8             | 3                 |
| <b>NHE_RS02540</b> | conserved hypothetical protein<br>Repeats: SSTGSCRPIAAPILNGASLHGYYTSLFEGNKDPGTV                                               | 346 - 526           | 36            | 5                 |
| <b>NHE_RS02570</b> | hypothetical protein<br>Repeats: LRKVGIIKEKPF TGDDLIAELKARIEKRSEKNPGKPTVSDSRKRMVTSDAKDSKQRETQGEKSGN<br>PRTITTETTLE            | 478 – 702           | 75            | 3                 |
| <b>NHE_RS02695</b> | conserved hypothetical protein<br>Repeats: VPATSAVMKSIASSTGEGGEVGLSPTLTFLKEVGEV                                               | 329 – 402           | 37            | 2                 |
| <b>NHE_RS03510</b> | conserved hypothetical protein<br>Repeats: AKYYSahrDEILQRRRESRARDPERFCEYG                                                     | 123 – 272           | 30            | 5                 |
| <b>NHE_RS03520</b> | hypothetical protein<br>Repeats 1: PEKFREYKAKHYSahrDEILQRRRESRARD<br>Repeats 2: KYYSahrDEILQRRRESRARDPEKFRGYGA                | 52 – 175            | 30            | 4                 |
|                    |                                                                                                                               | 229 - 288           | 30            | 2                 |

<sup>1</sup> Tandem repeats in protein were analyzed by T-REKS (<http://bioinfo.montp.cnrs.fr/?r=t-reks>) (Jorda and Kajava, 2009).

---

|                    |                                                                               |             |    |   |
|--------------------|-------------------------------------------------------------------------------|-------------|----|---|
| <b>NHE_RS03525</b> | hypothetical protein                                                          | 15 – 231    | 74 | 3 |
| Repeats 1:         | KKKAEQPIQGTSSSSAPGPSTADLSTSSGSTTVLAPKRRKLTPEEKRENRISQAKYYSAHRDE<br>IIQRQREQRA |             |    |   |
| Repeats 2:         | ERFREYKAKHYSahrdeILQRRRESRARDP                                                | 313 – 402   | 30 | 3 |
| <b>NHE_RS03670</b> | type IV secretion system protein, VirB6-3                                     | 1007 - 1243 | 47 | 5 |
| Repeats:           | KPKTGEGMVENPIYESGDPVQGAESTENPYSRLRGAEGQEPIYATVD                               |             |    |   |
| <b>NHE_RS03855</b> | Neorickettsia strain-specific surface antigen<br>(SSA)                        | 43 - 137    | 23 | 5 |
| Repeats:           | AAEVLKNTTAGDILKNST                                                            |             |    |   |
| <b>NHE_RS04070</b> | hypothetical protein                                                          | 130 – 353   | 56 | 4 |
| Repeats:           | NAPPESLQIELTLDQSEDSSEKQPITPPQQTEPVSLQHIEPTAPPEPHKTEPVIV                       |             |    |   |

---
