# Supplementary material for: Analysis of complete genome sequence and major surface antigens of Neorickettsia helminthoeca, causative agent of salmon poisoning disease
Source: PubMed Central journal article supplement (PMC5481527; doi:10.1111/1751-7915.12731), 2017-06-06
Supplement: MBT2-10-933-s015.pdf [file MBT2-10-933-s015.pdf]

**Supplementary Table 10. Lipoprotein processing enzymes and putative lipoproteins in *N. helminthoeca***

| Locus ID                                      | Protein Name                                     | Protein Length | LipoBox Sequences <sup>1</sup> |
|-----------------------------------------------|--------------------------------------------------|----------------|--------------------------------|
| <b><u>Lipoprotein processing enzymes:</u></b> |                                                  |                |                                |
| NHE_RS03645                                   | prolipoprotein diacylglyceryl transferase (Lgt)  | 264            | n/a                            |
| NHE_RS03900                                   | signal peptidase II (LspA)                       | 167            | n/a                            |
| NHE_RS02065                                   | apolipoprotein N-acyltransferase (Lnt)           | 472            | n/a                            |
| <b><u>Predicted Lipoproteins:</u></b>         |                                                  |                |                                |
| NHE_RS00570                                   | efflux transporter, RND family, MFP subunit      | 342            | IFLCS CLKDS                    |
| NHE_RS00745                                   | acriflavine resistance protein AcrB              | 1023           | FGSYA CFVIP                    |
| NHE_RS01690                                   | CBS domain protein                               | 421            | SLLLS CVFSG                    |
| NHE_RS01870                                   | beta-ketoacyl-[acyl-carrier-protein] synthase II | 416            | LGLVT CLSSK                    |
| NHE_RS02525                                   | conserved hypothetical protein                   | 323            | FSLSS CAKRG                    |
| NHE_RS02980                                   | D-alanyl-D-alanine carboxypeptidase              | 284            | SSLAH CTSAI                    |
| NHE_RS03040                                   | outer membrane protein assembly complex YaeT     | 744            | LFLDP CLAEN                    |
| NHE_RS03070                                   | pentapeptide repeat domain protein               | 552            | CSSAD CSHTS                    |
| NHE_RS03100                                   | conserved hypothetical protein                   | 304            | LCFAP CHSLE                    |
| NHE_RS03665                                   | type IV secretion system protein VirB6-4         | 1069           | FTFSG CDHCE                    |
| NHE_RS03670                                   | type IV secretion system protein VirB6-3         | 1243           | FLFNG CDIEC                    |
| NHE_RS03785                                   | peptidoglycan-associated lipoprotein (PAL/OmpA)  | 200            | LLMSG CFKKG                    |
| NHE_RS03940                                   | BamD lipoprotein                                 | 235            | LWVSG CTPGK                    |

<sup>1</sup> Putative lipoprotein was predicted by LipoP 1.0 (<http://www.cbs.dtu.dk/services/LipoP>). “|” indicate the predicted signal peptidase II cleavage site.
