# Supplementary material for: Analysis of complete genome sequence and major surface antigens of Neorickettsia helminthoeca, causative agent of salmon poisoning disease
Source: PubMed Central journal article supplement (PMC5481527; doi:10.1111/1751-7915.12731), 2017-06-06
Supplement: MBT2-10-933-s016.pdf [file MBT2-10-933-s016.pdf]

**Supplementary Table 11. Oligonucleotide primers used for cloning *N. helminthoeca* outer membrane proteins**

| Target genes                 | Primer Sequence (5' → 3') <sup>1</sup>                                                                    | Amplicon size |
|------------------------------|-----------------------------------------------------------------------------------------------------------|---------------|
| <i>p51</i><br>(NHE_RS00965)  | F: ATAGG <u>CCATGG</u> CTTCTGTAGAGAACCCATCAA<br>R: CTAGAG <u>AATTC</u> GTATATGATACTTTGAGACCTGAAG          | 1,422 bp      |
| <i>nsp1</i><br>(NHE_RS03715) | F: ATAGG <u>CCATGG</u> CGCTTTTCGGAATAAACGC<br>R: CTAGAG <u>AATTC</u> AATATTCCAAGCTGGATCTTGATTCC           | 703 bp        |
| <i>nsp2</i><br>(NHE_RS03720) | F: ATAGG <u>CCATGG</u> CCAAAGTAGAAGAAGCGGCGAATGC<br>R: CTAGAG <u>CGGCCGC</u> GCGTCAAGTGAAAAAGTAAC         | 870 bp        |
| <i>nsp3</i><br>(NHE_RS03725) | F: ATAGG <u>CCATGG</u> CGCAAGATGCCCTAGAGGATG<br>R: CTAGAG <u>CGGCCGC</u> ATTCATAGGTAGCATTAG               | 624 bp        |
| <i>ssa</i><br>(NHE_RS03855)  | F: ATAGG <u>CCATGG</u> ATCTGCTTAAGCATGATACCTCAAG<br>R: CTAGAG <u>CGGCCGC</u> TTTTTGGGGATAGTTATCTCTTTAAGTC | 1,002 bp      |

<sup>1</sup> Underlined sequences indicate restriction enzymes' recognition sites: F, Forward (*Nco*I); R, Reverse complement (*Eco*RI for *p51* and *nsp1*, *Not*I for *nsp2/3* and *ssa*). Stop codons and approximate 80 bp from 5'-end of these genes that encodes signal peptides were excluded in the amplicon.
